# Supplementary material
Source: publisher figshare collection journal article supplement (https://acs.figshare.com/ndownloader/files/5212816)
Supplement: Supplementary file 1 [file 5212816]

## Sheet: Table S1
Table S1. Protein identification using MaxQuant*.
Description	Protein IDs | Organism	#Proteins	#Peptides	Razor + unique peptides	#Unique Peptides	Sequence Coverage [%]	PEP	Intensity EPI1	Intensity EPI2	Intensity EPI3	Intensity TRIPO1	Intensity TRIPO2	Intensity TRIPO3	LFQ intensity EPI1	LFQ intensity EPI2	LFQ intensity EPI3	LFQ intensity TRIPO1	LFQ intensity TRIPO2	LFQ intensity TRIPO3
histone H1, putative	TcCLB.510225.10 | Trypanosoma cruzi CL Brener Non-Esmeraldo-like	1	6	6	4	31.9	1.6958e-17	0	0	0	0	0	0	0	0	0	0	0	0
histone H1, putative	TcCLB.509837.40 | Trypanosoma cruzi CL Brener Esmeraldo-like	1	12	12	10	30.4	3.3134e-24	0	0	0	0	0	0	0	0	0	0	0	0
histone H2A, putative	TcCLB.506513.200 | Trypanosoma cruzi CL Brener Esmeraldo-like	1	3	1	1	65	7.5239e-22	0	0	0	3935800	2503800	122470	0	0	0	21938000	0	0
histone H2A, putative	TcCLB.509207.11 | Trypanosoma cruzi CL Brener Non-Esmeraldo-like;TcCLB.509207.20 | Trypanosoma cruzi CL Brener Non-Esmeraldo-like; TcCLB.511809.135 | Trypanosoma cruzi CL Brener Non-Esmeraldo-like; TcCLB.511809.140 | Trypanosoma cruzi CL Brener Non-Esmeraldo-like; TcCLB.511817.140 | Trypanosoma cruzi CL Brener Non-Esmeraldo-like; TcCLB.511817.161 | Trypanosoma cruzi CL Brener Non-Esmeraldo-like; …	9	12	2	0	49.6	1.3073e-87	66912000	33771000	34907000	97928000	108730000	42068000	96449000	46456000	99282000	147470000	273680000	126120000
histone H2A, putative	TcCLB.510525.100 | Trypanosoma cruzi CL Brener Esmeraldo-like; TcCLB.510525.110 | Trypanosoma cruzi CL Brener Esmeraldo-like; TcCLB.510525.80 | Trypanosoma cruzi CL Brener Esmeraldo-like; TcCLB.510525.90 | Trypanosoma cruzi CL Brener Esmeraldo-like	4	16	16	5	54.8	3.5372e-296	346310000	217590000	200560000	958100000	598320000	281170000	911240000	932250000	1036900000	3698000000	3417900000	1376400000
histone H2A, putative**	TcCLB.511323.40 | Trypanosoma cruzi CL Brener Non-Esmeraldo-like; TcCLB.507979.4 | Trypanosoma cruzi CL Brener Esmeraldo-like	2	6	6	4	27	1.9809e-18	17670000	17650000	19140000	94212000	89296000	30837000	92953000	146960000	149230000	566810000	812880000	181110000
histone H2B variant	TcCLB.506779.150 | Trypanosoma cruzi CL Brener Esmeraldo-like; TcCLB.511153.64 | Trypanosoma cruzi CL Brener Non-Esmeraldo-like	2	15	15	15	72	9.851e-115	12464000	3451000	11529000	42835000	49612000	21268000	0	0	0	257710000	324090000	91197000
histone H2B, putative	TcCLB.511635.20 | Trypanosoma cruzi CL Brener Non-Esmeraldo-like; TcCLB.511635.10 | Trypanosoma cruzi CL Brener Non-Esmeraldo-like	2	13	13	13	75	1.4383e-288	680360000	430980000	525600000	735420000	459540000	240080000	2902800000	1882600000	2431700000	6215600000	5496200000	1504100000
histone H3 variant	TcCLB.506503.150 | Trypanosoma cruzi CL Brener Esmeraldo-like; TcCLB.507033.20 | Trypanosoma cruzi CL Brener Non-Esmeraldo-like	2	8	8	8	62.9	5.4806e-35	3294300	1821000	2423900	1707100	6696500	1484500	0	0	0	2730200	18874000	2380900
histone H3, putative	TcCLB.509471.59 | Trypanosoma cruzi CL Brener Non-Esmeraldo-like; TcCLB.509471.68 | Trypanosoma cruzi CL Brener Non-Esmeraldo-like; TcCLB.509471.77 | Trypanosoma cruzi CL Brener Non-Esmeraldo-like; TcCLB.509471.86 | Trypanosoma cruzi CL Brener Non-Esmeraldo-like; TcCLB.509471.95 | Trypanosoma cruzi CL Brener Non-Esmeraldo-like	5	23	23	6	80.8	0	247230000	169470000	176500000	374470000	278610000	147440000	184010000	317310000	197980000	1957100000	1776700000	577990000
histone H3, putative	TcCLB.505931.40 | Trypanosoma cruzi CL Brener Esmeraldo-like; TcCLB.507817.18 | Trypanosoma cruzi CL Brener Esmeraldo-like; TcCLB.507817.9 | Trypanosoma cruzi CL Brener Esmeraldo-like	3	19	2	2	71.4	1.7379e-296	0	0	0	0	0	0	0	0	0	0	0	0
histone H4, putative	TcCLB.507941.150 | Trypanosoma cruzi CL Brener Esmeraldo-like; TcCLB.507941.160 | Trypanosoma cruzi CL Brener Esmeraldo-like; TcCLB.507941.170 | Trypanosoma cruzi CL Brener Esmeraldo-like; TcCLB.508203.20 | Trypanosoma cruzi CL Brener Esmeraldo-like; TcCLB.508203.29 | Trypanosoma cruzi CL Brener Esmeraldo-like; TcCLB.508203.38 | Trypanosoma cruzi CL Brener Esmeraldo-like; TcCLB.508203.47 | Trypan…	19	15	5	5	79	0	299410000	234230000	214680000	498820000	429220000	237110000	994660000	943310000	1194800000	3090500000	3141700000	1236300000
histone H4, putative	TcCLB.508739.60 | Trypanosoma cruzi CL Brener Non-Esmeraldo-like; TcCLB.511681.20 | Trypanosoma cruzi CL Brener Esmeraldo-like	2	15	15	5	78	0	686940000	299330000	317790000	1210900000	1052300000	498890000	1223300000	1897300000	2436500000	6596000000	9455900000	1846100000
*version1.3.0.5
**possibly a H2AZ

## Sheet: TableS2
Table S2. Protein identification using PEAKS Studio*.
Description	Protein Group	Protein ID	Organism	Sequence Coverage [%]	#Peptides	#Unique Peptides
histone H2A putative	3	TcCLB.510525.110	Trypanosoma cruzi CL Brener Esmeraldo-like	97	65	18
histone H2A putative	3	TcCLB.510525.90	Trypanosoma cruzi CL Brener Esmeraldo-like	97	65	18
histone H2A putative	5	TcCLB.511817.161	Trypanosoma cruzi CL Brener Non-Esmeraldo-like	98	56	0
histone H2A putative	5	TcCLB.511817.140	Trypanosoma cruzi CL Brener Non-Esmeraldo-like	98	56	0
histone H2A putative	5	TcCLB.509207.11	Trypanosoma cruzi CL Brener Non-Esmeraldo-like	98	56	0
histone H2A putative	5	TcCLB.511817.171	Trypanosoma cruzi CL Brener Non-Esmeraldo-like	98	56	0
histone H2A putative	5	TcCLB.511809.135	Trypanosoma cruzi CL Brener Non-Esmeraldo-like	98	56	0
histone H2A putative	5	TcCLB.509207.20	Trypanosoma cruzi CL Brener Non-Esmeraldo-like	98	56	0
histone H2A putative	5	TcCLB.511809.140	Trypanosoma cruzi CL Brener Non-Esmeraldo-like	98	56	0
histone H2A putative	6	TcCLB.511817.180	Trypanosoma cruzi CL Brener Non-Esmeraldo-like	98	56	1
histone H2A putative	7	TcCLB.511817.151	Trypanosoma cruzi CL Brener Non-Esmeraldo-like	98	52	5
histone H2A putative**	11	TcCLB.511323.40	Trypanosoma cruzi CL Brener Non-Esmeraldo-like	53	16	15
histone H2A putative	8	TcCLB.508321.21	Trypanosoma cruzi CL Brener Esmeraldo-like	95	48	1
histone H2B variant putative	10	TcCLB.511153.64	Trypanosoma cruzi CL Brener Non-Esmeraldo-like	87	22	21
histone H2B variant putative	10	TcCLB.506779.150	Trypanosoma cruzi CL Brener Esmeraldo-like	87	22	21
histone H3 putative	1	TcCLB.509471.59	Trypanosoma cruzi CL Brener Non-Esmeraldo-like	84	79	77
histone H3 putative	1	TcCLB.509471.86	Trypanosoma cruzi CL Brener Non-Esmeraldo-like	84	79	77
histone H3 putative	1	TcCLB.509471.77	Trypanosoma cruzi CL Brener Non-Esmeraldo-like	84	79	77
histone H3 putative	1	TcCLB.509471.68	Trypanosoma cruzi CL Brener Non-Esmeraldo-like	84	79	77
histone H3 variant putative	15	TcCLB.507033.20	Trypanosoma cruzi CL Brener Non-Esmeraldo-like	44	12	1
histone H3 variant putative	17	TcCLB.506503.150	Trypanosoma cruzi CL Brener Esmeraldo-like	52	12	1
histone H4 putative	2	TcCLB.507941.170	Trypanosoma cruzi CL Brener Esmeraldo-like	75	36	10
histone H4 putative	2	TcCLB.507941.160	Trypanosoma cruzi CL Brener Esmeraldo-like	75	36	10
histone H4 putative	2	TcCLB.508203.20	Trypanosoma cruzi CL Brener Esmeraldo-like	75	36	10
histone H4 putative	2	TcCLB.508203.47	Trypanosoma cruzi CL Brener Esmeraldo-like	75	36	10
histone H4 putative	2	TcCLB.510351.11	Trypanosoma cruzi CL Brener Esmeraldo-like	75	36	10
histone H4 putative	2	TcCLB.510351.31	Trypanosoma cruzi CL Brener Esmeraldo-like	75	36	10
histone H4 putative	2	TcCLB.507941.150	Trypanosoma cruzi CL Brener Esmeraldo-like	75	36	10
histone H4 putative	2	TcCLB.508203.56	Trypanosoma cruzi CL Brener Esmeraldo-like	75	36	10
histone H4 putative	2	TcCLB.508203.29	Trypanosoma cruzi CL Brener Esmeraldo-like	75	36	10
histone H4 putative	2	TcCLB.510351.20	Trypanosoma cruzi CL Brener Esmeraldo-like	75	36	10
histone H4 putative	2	TcCLB.508203.38	Trypanosoma cruzi CL Brener Esmeraldo-like	75	36	10
histone H4 putative	9	TcCLB.511681.20	Trypanosoma cruzi CL Brener Esmeraldo-like	71	30	4
histone H4 putative	9	TcCLB.508739.60	Trypanosoma cruzi CL Brener Non-Esmeraldo-like	71	30	4
histone H1 putative	12	TcCLB.506369.70	Trypanosoma cruzi CL Brener Esmeraldo-like	32	12	3
histone H1 putative	13	TcCLB.510225.10	Trypanosoma cruzi CL Brener Non-Esmeraldo-like	23	10	1
histone H2B putative	4	TcCLB.511635.10	Trypanosoma cruzi CL Brener Non-Esmeraldo-like	79	33	33
histone H2B putative	4	TcCLB.511635.20	Trypanosoma cruzi CL Brener Non-Esmeraldo-like	79	33	33
*version 7.5
Data from Peaks46
**possibly a H2AZ

## Sheet: TableS3
Table S3. Histone peptides identified using MaxQuant.
Peptide	PTM	Description	Protein IDs | Organism	Charges	Mass Error [ppm]	m/z	Mass	PEP	MS/MS Count	Intensity EPI1	Intensity EPI2	Intensity EPI3	Intensity TRIPO1	Intensity TRIPO2	Intensity TRIPO3
ASGGKKK*	Acetyl (K),Dimethyl (KR)	histone H2B variant, putative	TcCLB.511153.64 | Trypanosoma cruzi CL Brener Non-Esmeraldo-like;TcCLB.506779.150 | Trypanosoma cruzi CL Brener Esmeraldo-like	2	0.70775	373.232	744.449	0.011458	2 (1- protocol 1)	0	0	0	x	x	x
EVSGAQKEGLR**	Acetyl (K),Dimethyl (KR)	histone H3, putative	TcCLB.505931.40 | Trypanosoma cruzi CL Brener Esmeraldo-like;TcCLB.507817.18 | Trypanosoma cruzi CL Brener Esmeraldo-like;TcCLB.507817.9 | Trypanosoma cruzi CL Brener Esmeraldo-like;TcCLB.509471.59 | Trypanosoma cruzi CL Brener Non-Esmeraldo-like;TcCLB.509471.68 | Trypanosoma cruzi CL Brener Non-Esmeraldo-like;TcCLB.509471.77 | Trypanosoma cruzi CL Brener Non-Esmeraldo-like;TcCLB.509471.86 | Tryp…	2	NaN	622.336	1242.66	2.0022e-23	1	4765000**	x	x	x	x	x
ALAKKHK	2 Acetyl (K)	histone H2A, putative	TcCLB.509207.11 | Trypanosoma cruzi CL Brener Non-Esmeraldo-like;TcCLB.509207.20 | Trypanosoma cruzi CL Brener Non-Esmeraldo-like;TcCLB.511809.135 | Trypanosoma cruzi CL Brener Non-Esmeraldo-like;TcCLB.511809.140 | Trypanosoma cruzi CL Brener Non-Esmeraldo-like;TcCLB.511817.140 | Trypanosoma cruzi CL Brener Non-Esmeraldo-like;TcCLB.511817.161 | Trypanosoma cruzi CL Brener Non-Esmeraldo-like;TcCLB…	2	0.10073	440.274	878.534	0.14948	6	0	0	0	3821200	6786900	1085600
SGEAKGTQKR	2 Acetyl (K)	histone H4, putative	TcCLB.507941.150 | Trypanosoma cruzi CL Brener Esmeraldo-like;TcCLB.507941.160 | Trypanosoma cruzi CL Brener Esmeraldo-like;TcCLB.507941.170 | Trypanosoma cruzi CL Brener Esmeraldo-like;TcCLB.508203.20 | Trypanosoma cruzi CL Brener Esmeraldo-like;TcCLB.508203.29 | Trypanosoma cruzi CL Brener Esmeraldo-like;TcCLB.508203.38 | Trypanosoma cruzi CL Brener Esmeraldo-like;TcCLB.508203.47 | Trypanosoma …	2	-0.52734	573.299	1144.58	6.9127e-15	2	0	0	0	239070	512040	130900
TAAKKTAR	2 Acetyl (K),Dimethyl (KR)	histone H1, putative	TcCLB.510225.10 | Trypanosoma cruzi CL Brener Non-Esmeraldo-like	2	0.067402	479.788	957.561	0.013982	3	16294000	9548500	22860000	2344700	2153100	4636100
GGVMPSLNKALAK	Acetyl (K)	histone H2A, putative	TcCLB.509207.11 | Trypanosoma cruzi CL Brener Non-Esmeraldo-like;TcCLB.509207.20 | Trypanosoma cruzi CL Brener Non-Esmeraldo-like;TcCLB.511809.135 | Trypanosoma cruzi CL Brener Non-Esmeraldo-like;TcCLB.511809.140 | Trypanosoma cruzi CL Brener Non-Esmeraldo-like;TcCLB.511817.140 | Trypanosoma cruzi CL Brener Non-Esmeraldo-like;TcCLB.511817.161 | Trypanosoma cruzi CL Brener Non-Esmeraldo-like;TcCLB…	2	-0.074558	664.374	1326.73	8.4296e-08	10	4215900	2376300	3251900	21493000	25726000	3203800
QPDQKKASK	Acetyl (K),Phospho (STY),2 Trimethyl (K)	histone H1, putative	TcCLB.509837.40 | Trypanosoma cruzi CL Brener Esmeraldo-like	2	0.71453	618.323	1234.63	0.001872	3	0	0	0	607700	1227100	1058800
AVNKSAK	Acetyl (K),Trimethyl (K)	histone H1, putative	TcCLB.509837.40 | Trypanosoma cruzi CL Brener Esmeraldo-like	2	NaN	401.245	800.476	0.011309	1	0	0	0	0	0	0
KAVNKSAK	Acetyl (K),Trimethyl (K)	histone H1, putative	TcCLB.509837.40 | Trypanosoma cruzi CL Brener Esmeraldo-like	2	NaN	465.293	928.571	0.022118	1	0	0	0	0	0	0
APKAPGAATGVK	Dimethyl (KR)	histone H3, putative	TcCLB.505931.40 | Trypanosoma cruzi CL Brener Esmeraldo-like;TcCLB.507817.18 | Trypanosoma cruzi CL Brener Esmeraldo-like;TcCLB.507817.9 | Trypanosoma cruzi CL Brener Esmeraldo-like;TcCLB.509471.59 | Trypanosoma cruzi CL Brener Non-Esmeraldo-like;TcCLB.509471.68 | Trypanosoma cruzi CL Brener Non-Esmeraldo-like;TcCLB.509471.77 | Trypanosoma cruzi CL Brener Non-Esmeraldo-like;TcCLB.509471.86 | Tryp…	2	-0.50775	548.33	1094.64	1.8155e-60	1	0	0	0	937040	0	0
EVSGAQKEGLR	Dimethyl (KR)	histone H3, putative	TcCLB.505931.40 | Trypanosoma cruzi CL Brener Esmeraldo-like;TcCLB.507817.18 | Trypanosoma cruzi CL Brener Esmeraldo-like;TcCLB.507817.9 | Trypanosoma cruzi CL Brener Esmeraldo-like;TcCLB.509471.59 | Trypanosoma cruzi CL Brener Non-Esmeraldo-like;TcCLB.509471.68 | Trypanosoma cruzi CL Brener Non-Esmeraldo-like;TcCLB.509471.77 | Trypanosoma cruzi CL Brener Non-Esmeraldo-like;TcCLB.509471.86 | Tryp…	2	0.014852	601.33	1200.65	3.0369e-21	11	6990600	7305300	6967200	4651000	5514000	3640900
EVSGAQKEGLR	Methyl (KR)	histone H3, putative	TcCLB.505931.40 | Trypanosoma cruzi CL Brener Esmeraldo-like;TcCLB.507817.18 | Trypanosoma cruzi CL Brener Esmeraldo-like;TcCLB.507817.9 | Trypanosoma cruzi CL Brener Esmeraldo-like;TcCLB.509471.59 | Trypanosoma cruzi CL Brener Non-Esmeraldo-like;TcCLB.509471.68 | Trypanosoma cruzi CL Brener Non-Esmeraldo-like;TcCLB.509471.77 | Trypanosoma cruzi CL Brener Non-Esmeraldo-like;TcCLB.509471.86 | Tryp…	2	-0.043374	594.323	1186.63	0.00067397	3	6463800	3904700	3688900	0	129480	224370
KAPKAPGAATGVK	Methyl (KR)	histone H3, putative	TcCLB.505931.40 | Trypanosoma cruzi CL Brener Esmeraldo-like;TcCLB.507817.18 | Trypanosoma cruzi CL Brener Esmeraldo-like;TcCLB.507817.9 | Trypanosoma cruzi CL Brener Esmeraldo-like;TcCLB.509471.59 | Trypanosoma cruzi CL Brener Non-Esmeraldo-like;TcCLB.509471.68 | Trypanosoma cruzi CL Brener Non-Esmeraldo-like;TcCLB.509471.77 | Trypanosoma cruzi CL Brener Non-Esmeraldo-like;TcCLB.509471.86 | Tryp…	2	0.12532	605.369	1208.72	0.012204	2	423470	356600	451100	1248400	1114000	418570
MATPKSSSANRK	Oxidation (M),2 Methyl (KR),Trimethyl (K)	histone H2B, putative	TcCLB.511635.20 | Trypanosoma cruzi CL Brener Non-Esmeraldo-like;TcCLB.511635.10 | Trypanosoma cruzi CL Brener Non-Esmeraldo-like	3	-0.83411	455.25	1362.73	0.021668	1	0	0	2063500	0	0	0
EIVSNLKDSFR	Trimethyl (K)	histone H3 variant, putative	TcCLB.506503.150 | Trypanosoma cruzi CL Brener Esmeraldo-like;TcCLB.507033.20 | Trypanosoma cruzi CL Brener Non-Esmeraldo-like	2	0.37481	675.375	1348.74	0.0028922	2	0	0	0	1112600	953860	879190
EVSGAQKEGLR	Trimethyl (K)	histone H3, putative	TcCLB.505931.40 | Trypanosoma cruzi CL Brener Esmeraldo-like;TcCLB.507817.18 | Trypanosoma cruzi CL Brener Esmeraldo-like;TcCLB.507817.9 | Trypanosoma cruzi CL Brener Esmeraldo-like;TcCLB.509471.59 | Trypanosoma cruzi CL Brener Non-Esmeraldo-like;TcCLB.509471.68 | Trypanosoma cruzi CL Brener Non-Esmeraldo-like;TcCLB.509471.77 | Trypanosoma cruzi CL Brener Non-Esmeraldo-like;TcCLB.509471.86 | Tryp…	2	-0.022953	608.338	1214.66	6.6745e-06	30	85058000	17781000	26867000	232600000	115170000	113390000
ACIHSGR	Unmodified	histone H3, putative	TcCLB.505931.40 | Trypanosoma cruzi CL Brener Esmeraldo-like;TcCLB.507817.18 | Trypanosoma cruzi CL Brener Esmeraldo-like;TcCLB.507817.9 | Trypanosoma cruzi CL Brener Esmeraldo-like;TcCLB.509471.59 | Trypanosoma cruzi CL Brener Non-Esmeraldo-like;TcCLB.509471.68 | Trypanosoma cruzi CL Brener Non-Esmeraldo-like;TcCLB.509471.77 | Trypanosoma cruzi CL Brener Non-Esmeraldo-like;TcCLB.509471.86 | Tryp…	2	0.034031	400.695	799.376	0.04235	7	216060	120660	664070	0	661230	888420
ADLNFPVGR	Unmodified	histone H3, putative	TcCLB.511323.40 | Trypanosoma cruzi CL Brener Non-Esmeraldo-like;TcCLB.507979.4 | Trypanosoma cruzi CL Brener Esmeraldo-like	2	0.11241	494.764	987.514	1.1049e-06	8	10601000	10797000	9668500	44540000	41566000	16070000
AGLIFPVGR	Unmodified	histone H2A, putative	TcCLB.509207.11 | Trypanosoma cruzi CL Brener Non-Esmeraldo-like;TcCLB.509207.20 | Trypanosoma cruzi CL Brener Non-Esmeraldo-like;TcCLB.511809.135 | Trypanosoma cruzi CL Brener Non-Esmeraldo-like;TcCLB.511809.140 | Trypanosoma cruzi CL Brener Non-Esmeraldo-like;TcCLB.517.140 | Trypanosoma cruzi CL Brener Non-Esmeraldo-like;TcCLB.511817.161 | Trypanosoma cruzi CL Brener Non-Esmeraldo-like;TcCLB.51…	2	-0.0098744	465.282	928.549	0.00078399	26	4504400	6200200	16936000	231040000	143770000	92366000
APGAATGVK	Unmodified	histone H3, putative	TcCLB.505931.40 | Trypanosoma cruzi CL Brener Esmeraldo-like;TcCLB.507817.18 | Trypanosoma cruzi CL Brener Esmeraldo-like;TcCLB.507817.9 | Trypanosoma cruzi CL Brener Esmeraldo-like;TcCLB.509471.59 | Trypanosoma cruzi CL Brener Non-Esmeraldo-like;TcCLB.509471.68 | Trypanosoma cruzi CL Brener Non-Esmeraldo-like;TcCLB.509471.77 | Trypanosoma cruzi CL Brener Non-Esmeraldo-like;TcCLB.509471.86 | Tryp…	2	0.055507	386.222	770.429	0.00074747	7	2139300	1452200	1067100	9974100	6718800	3235600
APGAATGVKHAQR	Unmodified	histone H3, putative	TcCLB.505931.40 | Trypanosoma cruzi CL Brener Esmeraldo-like;TcCLB.507817.18 | Trypanosoma cruzi CL Brener Esmeraldo-like;TcCLB.507817.9 | Trypanosoma cruzi CL Brener Esmeraldo-like;TcCLB.509471.59 | Trypanosoma cruzi CL Brener Non-Esmeraldo-like;TcCLB.509471.68 | Trypanosoma cruzi CL Brener Non-Esmeraldo-like;TcCLB.509471.77 | Trypanosoma cruzi CL Brener Non-Esmeraldo-like;TcCLB.509471.86 | Tryp…	2	-1.3359	632.349	1262.68	1.1063e-34	4	0	0	0	0	55764	0
APKAPGAATGVK	Unmodified	histone H3, putative	TcCLB.505931.40 | Trypanosoma cruzi CL Brener Esmeraldo-like;TcCLB.507817.18 | Trypanosoma cruzi CL Brener Esmeraldo-like;TcCLB.507817.9 | Trypanosoma cruzi CL Brener Esmeraldo-like;TcCLB.509471.59 | Trypanosoma cruzi CL Brener Non-Esmeraldo-like;TcCLB.509471.68 | Trypanosoma cruzi CL Brener Non-Esmeraldo-like;TcCLB.509471.77 | Trypanosoma cruzi CL Brener Non-Esmeraldo-like;TcCLB.509471.86 | Tryp…	2.3	-0.012593	356.545	1066.61	3.1604e-18	7	0	0	0	20029000	11962000	3279000
ARATPSA	Unmodified	histone H2A, putative	TcCLB.509207.11 | Trypanosoma cruzi CL Brener Non-Esmeraldo-like;TcCLB.509207.20 | Trypanosoma cruzi CL Brener Non-Esmeraldo-like;TcCLB.511809.135 | Trypanosoma cruzi CL Brener Non-Esmeraldo-like;TcCLB.511809.140 | Trypanosoma cruzi CL Brener Non-Esmeraldo-like;TcCLB.511817.140 | Trypanosoma cruzi CL Brener Non-Esmeraldo-like;TcCLB.511817.161 | Trypanosoma cruzi CL Brener Non-Esmeraldo-like;TcCLB…	2	NaN	337.185	672.355	0.0079645	2	0	0	0	0	0	0
AVSHASS	Unmodified	histone H2B, putative	TcCLB.511635.20 | Trypanosoma cruzi CL Brener Non-Esmeraldo-like;TcCLB.511635.10 | Trypanosoma cruzi CL Brener Non-Esmeraldo-like	2	NaN	329.661	657.308	0.011686	1	0	0	0	0	0	0
DATAYTEYSR	Unmodified	histone H4, putative	TcCLB.507941.150 | Trypanosoma cruzi CL Brener Esmeraldo-like;TcCLB.507941.160 | Trypanosoma cruzi CL Brener Esmeraldo-like;TcCLB.507941.170 | Trypanosoma cruzi CL Brener Esmeraldo-like;TcCLB.508203.20 | Trypanosoma cruzi CL Brener Esmeraldo-like;TcCLB.508203.29 | Trypanosoma cruzi CL Brener Esmeraldo-like;TcCLB.508203.38 | Trypanosoma cruzi CL Brener Esmeraldo-like;TcCLB.508203.47 | Trypanosoma …	2	-0.18947	588.762	1175.51	1.2328e-32	21	131680000	76012000	73043000	243050000	187150000	129700000
DATAYTEYSRK	Unmodified	histone H4, putative	TcCLB.507941.150 | Trypanosoma cruzi CL Brener Esmeraldo-like;TcCLB.507941.160 | Trypanosoma cruzi CL Brener Esmeraldo-like;TcCLB.507941.170 | Trypanosoma cruzi CL Brener Esmeraldo-like;TcCLB.508203.20 | Trypanosoma cruzi CL Brener Esmeraldo-like;TcCLB.508203.29 | Trypanosoma cruzi CL Brener Esmeraldo-like;TcCLB.508203.38 | Trypanosoma cruzi CL Brener Esmeraldo-like;TcCLB.508203.47 | Trypanosoma …	2	0.32192	652.809	1303.6	0.00045654	3	0	0	0	10727000	8066900	2680100
DIHLALCLR	Unmodified	histone H3, putative	TcCLB.505931.40 | Trypanosoma cruzi CL Brener Esmeraldo-like;TcCLB.507817.18 | Trypanosoma cruzi CL Brener Esmeraldo-like;TcCLB.507817.9 | Trypanosoma cruzi CL Brener Esmeraldo-like;TcCLB.509471.59 | Trypanosoma cruzi CL Brener Non-Esmeraldo-like;TcCLB.509471.68 | Trypanosoma cruzi CL Brener Non-Esmeraldo-like;TcCLB.509471.77 | Trypanosoma cruzi CL Brener Non-Esmeraldo-like;TcCLB.509471.86 | Tryp…	2	-0.26976	555.808	1109.6	0.0031758	3	339100	222460	573240	0	0	755880
DIQLALK	Unmodified	histone H3 variant, putative	TcCLB.506503.150 | Trypanosoma cruzi CL Brener Esmeraldo-like;TcCLB.507033.20 | Trypanosoma cruzi CL Brener Non-Esmeraldo-like	2	-0.053742	400.747	799.48	1.5227e-05	5	3294300	1821000	2423900	242450	5596800	389400
ELQTAVR	Unmodified	histone H2B, putative	TcCLB.511635.20 | Trypanosoma cruzi CL Brener Non-Esmeraldo-like;TcCLB.511635.10 | Trypanosoma cruzi CL Brener Non-Esmeraldo-like	2	0.077618	408.732	815.45	0.00062076	16	0	0	0	97333000	49153000	14468000
EVSGAQKEGLR	Unmodified	histone H3, putative	TcCLB.505931.40 | Trypanosoma cruzi CL Brener Esmeraldo-like;TcCLB.507817.18 | Trypanosoma cruzi CL Brener Esmeraldo-like;TcCLB.507817.9 | Trypanosoma cruzi CL Brener Esmeraldo-like;TcCLB.509471.59 | Trypanosoma cruzi CL Brener Non-Esmeraldo-like;TcCLB.509471.68 | Trypanosoma cruzi CL Brener Non-Esmeraldo-like;TcCLB.509471.77 | Trypanosoma cruzi CL Brener Non-Esmeraldo-like;TcCLB.509471.86 | Tryp…	2	0.092787	587.315	1172.61	0.0012107	3	3661000	2537800	5507700	0	0	0
FQSSAILAAQEATESYVVSLLADTNR	Unmodified	histone H3, putative	TcCLB.505931.40 | Trypanosoma cruzi CL Brener Esmeraldo-like;TcCLB.507817.18 | Trypanosoma cruzi CL Brener Esmeraldo-like;TcCLB.507817.9 | Trypanosoma cruzi CL Brener Esmeraldo-like;TcCLB.509471.59 | Trypanosoma cruzi CL Brener Non-Esmeraldo-like;TcCLB.509471.68 | Trypanosoma cruzi CL Brener Non-Esmeraldo-like;TcCLB.509471.77 | Trypanosoma cruzi CL Brener Non-Esmeraldo-like;TcCLB.509471.86 | Tryp…	2,3,4	-0.034097	696.857	2783.4	9.2431e-79	14	7191700	10135000	4304100	73109000	25556000	10230000
FVEGVVR	Unmodified	histone H4, putative	TcCLB.508739.60 | Trypanosoma cruzi CL Brener Non-Esmeraldo-like;TcCLB.511681.20 | Trypanosoma cruzi CL Brener Esmeraldo-like	2	0.0087886	403.232	804.449	0.006329	1	0	0	0	50330000	44647000	14616000
GGVMPSLNK	Unmodified	histone H2A, putative	TcCLB.509207.11 | Trypanosoma cruzi CL Brener Non-Esmeraldo-like;TcCLB.509207.20 | Trypanosoma cruzi CL Brener Non-Esmeraldo-like;TcCLB.511809.135 | Trypanosoma cruzi CL Brener Non-Esmeraldo-like;TcCLB.511809.140 | Trypanosoma cruzi CL Brener Non-Esmeraldo-like;TcCLB.511817.140 | Trypanosoma cruzi CL Brener Non-Esmeraldo-like;TcCLB.511817.161 | Trypanosoma cruzi CL Brener Non-Esmeraldo-like;TcCLB…	2	-0.022078	451.742	901.469	6.0859e-05	16	66388000	40679000	48328000	306970000	51192000	71430000
GGVVPFVHK	Unmodified	histone H2A, putative	TcCLB.511323.40 | Trypanosoma cruzi CL Brener Non-Esmeraldo-like;TcCLB.506513.200 | Trypanosoma cruzi CL Brener Esmeraldo-like	2.3	0.021856	470.274	938.534	0.16637	23	7068600	6852900	9471500	49672000	47730000	14768000
GKILYGYA	Unmodified	histone H4, putative	TcCLB.507941.150 | Trypanosoma cruzi CL Brener Esmeraldo-like;TcCLB.507941.160 | Trypanosoma cruzi CL Brener Esmeraldo-like;TcCLB.507941.170 | Trypanosoma cruzi CL Brener Esmeraldo-like;TcCLB.508203.20 | Trypanosoma cruzi CL Brener Esmeraldo-like;TcCLB.508203.29 | Trypanosoma cruzi CL Brener Esmeraldo-like;TcCLB.508203.38 | Trypanosoma cruzi CL Brener Esmeraldo-like;TcCLB.508203.47 | Trypanosoma …	2	0.090817	442.747	883.48	0.0079746	5	0	2822100	9306300	33935000	21799000	9170800
GKILYGYE	Unmodified	histone H4, putative	TcCLB.508739.60 | Trypanosoma cruzi CL Brener Non-Esmeraldo-like;TcCLB.511681.20 | Trypanosoma cruzi CL Brener Esmeraldo-like	2	0.044971	471.75	941.486	0.0098173	1	0	0	0	2361900	2118700	432020
HAMAEGTK	Unmodified	histone H2B, putative	TcCLB.511635.20 | Trypanosoma cruzi CL Brener Non-Esmeraldo-like;TcCLB.511635.10 | Trypanosoma cruzi CL Brener Non-Esmeraldo-like	2	0.017965	422.703	843.391	0.014089	82	11843000	303380	207010	116170000	36934000	2875100
HAMAEGTKAVSHASS	Unmodified	histone H2B, putative	TcCLB.511635.20 | Trypanosoma cruzi CL Brener Non-Esmeraldo-like;TcCLB.511635.10 | Trypanosoma cruzi CL Brener Non-Esmeraldo-like	2	0.40426	742.352	1482.69	1.9397e-23	2	612230	0	383260	0	0	0
HAMSEGTK	Unmodified	histone H2B variant, putative	TcCLB.506779.150 | Trypanosoma cruzi CL Brener Esmeraldo-like;TcCLB.511153.64 | Trypanosoma cruzi CL Brener Non-Esmeraldo-like	2	NaN	430.7	859.386	0.013796	1	0	0	0	0	0	0
HDDDLGMLLK	Unmodified	histone H2A, putative	TcCLB.509207.11 | Trypanosoma cruzi CL Brener Non-Esmeraldo-like;TcCLB.509207.20 | Trypanosoma cruzi CL Brener Non-Esmeraldo-like;TcCLB.511809.135 | Trypanosoma cruzi CL Brener Non-Esmeraldo-like;TcCLB.511809.140 | Trypanosoma cruzi CL Brener Non-Esmeraldo-like;TcCLB.511817.140 | Trypanosoma cruzi CL Brener Non-Esmeraldo-like;TcCLB.511817.161 | Trypanosoma cruzi CL Brener Non-Esmeraldo-like;TcCLB…	2.3	0.11365	386.194	1155.56	0.059175	14	34742000	15276000	20159000	80190000	87390000	30806000
HDDDLGMLLKDVTLSR	Unmodified	histone H2A, putative	TcCLB.509207.11 | Trypanosoma cruzi CL Brener Non-Esmeraldo-like;TcCLB.509207.20 | Trypanosoma cruzi CL Brener Non-Esmeraldo-like;TcCLB.511809.135 | Trypanosoma cruzi CL Brener Non-Esmeraldo-like;TcCLB.511809.140 | Trypanosoma cruzi CL Brener Non-Esmeraldo-like;TcCLB.511817.140 | Trypanosoma cruzi CL Brener Non-Esmeraldo-like;TcCLB.511817.161 | Trypanosoma cruzi CL Brener Non-Esmeraldo-like;TcCLB…	2.3	-0.28202	914.467	1826.92	1.3255e-05	4	0	0	0	884360	576410	342470
HDDDLGTLLK	Unmodified	histone H2A, putative	TcCLB.510525.100 | Trypanosoma cruzi CL Brener Esmeraldo-like;TcCLB.510525.110 | Trypanosoma cruzi CL Brener Esmeraldo-like;TcCLB.510525.80 | Trypanosoma cruzi CL Brener Esmeraldo-like;TcCLB.510525.90 | Trypanosoma cruzi CL Brener Esmeraldo-like	2.3	-0.031426	376.196	1125.57	0.0050353	8	87530000	51809000	51700000	120370000	150510000	1317700
HDDDLGTLLKDVTLSR	Unmodified	histone H2A, putative	TcCLB.510525.100 | Trypanosoma cruzi CL Brener Esmeraldo-like;TcCLB.510525.110 | Trypanosoma cruzi CL Brener Esmeraldo-like;TcCLB.510525.80 | Trypanosoma cruzi CL Brener Esmeraldo-like;TcCLB.510525.90 | Trypanosoma cruzi CL Brener Esmeraldo-like	2.3	0.0010854	599.983	1796.93	1.3242e-118	108	16283000	1480900	5097600	15350000	10865000	7804100
ILRENVR	Unmodified	histone H4, putative	TcCLB.507941.150 | Trypanosoma cruzi CL Brener Esmeraldo-like;TcCLB.507941.160 | Trypanosoma cruzi CL Brener Esmeraldo-like;TcCLB.507941.170 | Trypanosoma cruzi CL Brener Esmeraldo-like;TcCLB.508203.20 | Trypanosoma cruzi CL Brener Esmeraldo-like;TcCLB.508203.29 | Trypanosoma cruzi CL Brener Esmeraldo-like;TcCLB.508203.38 | Trypanosoma cruzi CL Brener Esmeraldo-like;TcCLB.508203.47 | Trypanosoma …	2	-0.10824	450.275	898.535	0.007849	9	27605000	28898000	29437000	101180000	88128000	51728000
IRGDEELNQIVNATIAR	Unmodified	histone H2A, putative	TcCLB.506513.200 | Trypanosoma cruzi CL Brener Esmeraldo-like	3	-0.055279	638.013	1911.02	2.0654e-15	6	0	0	0	3935800	2503800	122470
ISGVIYDEVR	Unmodified	histone H4, putative	TcCLB.507941.150 | Trypanosoma cruzi CL Brener Esmeraldo-like;TcCLB.507941.160 | Trypanosoma cruzi CL Brener Esmeraldo-like;TcCLB.507941.170 | Trypanosoma cruzi CL Brener Esmeraldo-like;TcCLB.508203.20 | Trypanosoma cruzi CL Brener Esmeraldo-like;TcCLB.508203.29 | Trypanosoma cruzi CL Brener Esmeraldo-like;TcCLB.508203.38 | Trypanosoma cruzi CL Brener Esmeraldo-like;TcCLB.508203.47 | Trypanosoma …	2	0.13559	575.809	1149.6	1.0279e-15	15	149540000	105320000	88291000	59808000	70273000	56817000
ISGVMYDEVR	Unmodified	histone H4, putative	TcCLB.508739.60 | Trypanosoma cruzi CL Brener Non-Esmeraldo-like;TcCLB.511681.20 | Trypanosoma cruzi CL Brener Esmeraldo-like	2	0.0067021	584.787	1167.56	0.29843	3	0	0	0	10824000	12694000	643860
IVNSFVNDLFER	Unmodified	histone H2B, putative	TcCLB.511635.20 | Trypanosoma cruzi CL Brener Non-Esmeraldo-like;TcCLB.511635.10 | Trypanosoma cruzi CL Brener Non-Esmeraldo-like	2.3	-0.0068145	726.878	1451.74	5.8469e-167	74	30940000	10672000	46766000	128280000	82611000	60272000
KAPKAPGAATGVK	Unmodified	histone H3, putative	TcCLB.505931.40 | Trypanosoma cruzi CL Brener Esmeraldo-like;TcCLB.507817.18 | Trypanosoma cruzi CL Brener Esmeraldo-like;TcCLB.507817.9 | Trypanosoma cruzi CL Brener Esmeraldo-like;TcCLB.509471.59 | Trypanosoma cruzi CL Brener Non-Esmeraldo-like;TcCLB.509471.68 | Trypanosoma cruzi CL Brener Non-Esmeraldo-like;TcCLB.509471.77 | Trypanosoma cruzi CL Brener Non-Esmeraldo-like;TcCLB.509471.86 | Tryp…	2	0.25555	598.361	1194.71	0.00093085	5	1098000	59589	2805900	6065600	2958200	1481500
KFVEGVVR	Unmodified	histone H4, putative	TcCLB.508739.60 | Trypanosoma cruzi CL Brener Non-Esmeraldo-like;TcCLB.511681.20 | Trypanosoma cruzi CL Brener Esmeraldo-like	2.3	-0.0041896	467.279	932.544	5.2528e-09	9	0	0	0	15329000	12459000	3733000
KKTVTAVDVVNALR	Unmodified	histone H4, putative	TcCLB.507941.150 | Trypanosoma cruzi CL Brener Esmeraldo-like;TcCLB.507941.160 | Trypanosoma cruzi CL Brener Esmeraldo-like;TcCLB.507941.170 | Trypanosoma cruzi CL Brener Esmeraldo-like;TcCLB.508203.20 | Trypanosoma cruzi CL Brener Esmeraldo-like;TcCLB.508203.29 | Trypanosoma cruzi CL Brener Esmeraldo-like;TcCLB.508203.38 | Trypanosoma cruzi CL Brener Esmeraldo-like;TcCLB.508203.47 | Trypanosoma …	2.3	0.029196	757.457	1512.9	4.6383e-41	36	4168400	17213000	39077000	45088000	68609000	33830000
KTVTAVDVVNALR	Unmodified	histone H4, putative	TcCLB.507941.150 | Trypanosoma cruzi CL Brener Esmeraldo-like;TcCLB.507941.160 | Trypanosoma cruzi CL Brener Esmeraldo-like;TcCLB.507941.170 | Trypanosoma cruzi CL Brener Esmeraldo-like;TcCLB.508203.20 | Trypanosoma cruzi CL Brener Esmeraldo-like;TcCLB.508203.29 | Trypanosoma cruzi CL Brener Esmeraldo-like;TcCLB.508203.38 | Trypanosoma cruzi CL Brener Esmeraldo-like;TcCLB.508203.47 | Trypanosoma …	2.3	-0.018184	462.609	1384.8	1.0383e-21	15	3937800	2504200	13490000	187980000	203500000	39994000
KTVTAVDVVNALRK	Unmodified	histone H4, putative	TcCLB.507941.150 | Trypanosoma cruzi CL Brener Esmeraldo-like;TcCLB.507941.160 | Trypanosoma cruzi CL Brener Esmeraldo-like;TcCLB.507941.170 | Trypanosoma cruzi CL Brener Esmeraldo-like;TcCLB.508203.20 | Trypanosoma cruzi CL Brener Esmeraldo-like;TcCLB.508203.29 | Trypanosoma cruzi CL Brener Esmeraldo-like;TcCLB.508203.38 | Trypanosoma cruzi CL Brener Esmeraldo-like;TcCLB.508203.47 | Trypanosoma …	3	0.95485	505.307	1512.9	3.512e-42	3	0	0	0	5264400	4546500	1539000
LKDGLNR	Unmodified	histone H2A, putative	TcCLB.511323.40 | Trypanosoma cruzi CL Brener Non-Esmeraldo-like;TcCLB.507979.4 | Trypanosoma cruzi CL Brener Esmeraldo-like	2	NaN	408.24	814.466	0.016422	1	0	0	0	0	0	0
LLLPPELAK	Unmodified	histone H2B variant, putative	TcCLB.506779.150 | Trypanosoma cruzi CL Brener Esmeraldo-like;TcCLB.511153.64 | Trypanosoma cruzi CL Brener Non-Esmeraldo-like	2	0.024643	497.321	992.627	0.00025755	18	12464000	3451000	11529000	18303000	25183000	10133000
LVLPADLAK	Unmodified	histone H2B, putative	TcCLB.511635.20 | Trypanosoma cruzi CL Brener Non-Esmeraldo-like;TcCLB.511635.10 | Trypanosoma cruzi CL Brener Non-Esmeraldo-like	2	0.0014912	470.297	938.58	0.00027992	26	552790000	333620000	425520000	93895000	105620000	25670000
PGTVALR	Unmodified	histone H3, putative	TcCLB.505931.40 | Trypanosoma cruzi CL Brener Esmeraldo-like;TcCLB.507817.18 | Trypanosoma cruzi CL Brener Esmeraldo-like;TcCLB.507817.9 | Trypanosoma cruzi CL Brener Esmeraldo-like;TcCLB.509471.59 | Trypanosoma cruzi CL Brener Non-Esmeraldo-like;TcCLB.509471.68 | Trypanosoma cruzi CL Brener Non-Esmeraldo-like;TcCLB.509471.77 | Trypanosoma cruzi CL Brener Non-Esmeraldo-like;TcCLB.509471.86 | Tryp…	2	0.13332	357.219	712.423	1.435e-12	7	2055300	1942300	963520	9560500	7310200	3941100
RISGVIYDEVR	Unmodified	histone H4, putative	TcCLB.507941.150 | Trypanosoma cruzi CL Brener Esmeraldo-like;TcCLB.507941.160 | Trypanosoma cruzi CL Brener Esmeraldo-like;TcCLB.507941.170 | Trypanosoma cruzi CL Brener Esmeraldo-like;TcCLB.508203.20 | Trypanosoma cruzi CL Brener Esmeraldo-like;TcCLB.508203.29 | Trypanosoma cruzi CL Brener Esmeraldo-like;TcCLB.508203.38 | Trypanosoma cruzi CL Brener Esmeraldo-like;TcCLB.508203.47 | Trypanosoma …	2.3	0.0059097	653.859	1305.7	0.0006506	174	6057100	5091900	9794600	143280000	91270000	27655000
RISGVMYDEVR	Unmodified	histone H4, putative	TcCLB.508739.60 | Trypanosoma cruzi CL Brener Non-Esmeraldo-like;TcCLB.511681.20 | Trypanosoma cruzi CL Brener Esmeraldo-like	2.3	0.0021819	662.838	1323.66	0.0002469	19	0	0	0	30618000	17323000	3193500
RPLPMGGK	Unmodified	histone H2B variant, putative	TcCLB.506779.150 | Trypanosoma cruzi CL Brener Esmeraldo-like;TcCLB.511153.64 | Trypanosoma cruzi CL Brener Non-Esmeraldo-like	2	0.50304	428.247	854.48	0.020746	3	0	0	0	784750	518130	201520
SFVEGVVR	Unmodified	histone H4, putative	TcCLB.507941.150 | Trypanosoma cruzi CL Brener Esmeraldo-like;TcCLB.507941.160 | Trypanosoma cruzi CL Brener Esmeraldo-like;TcCLB.507941.170 | Trypanosoma cruzi CL Brener Esmeraldo-like;TcCLB.508203.20 | Trypanosoma cruzi CL Brener Esmeraldo-like;TcCLB.508203.29 | Trypanosoma cruzi CL Brener Esmeraldo-like;TcCLB.508203.38 | Trypanosoma cruzi CL Brener Esmeraldo-like;TcCLB.508203.47 | Trypanosoma …	2	-0.00037203	446.748	891.481	8.9378e-09	20	143820000	121000000	107290000	261790000	245880000	143470000
SINNHMSMSGR	Unmodified	histone H2B, putative	TcCLB.511635.20 | Trypanosoma cruzi CL Brener Non-Esmeraldo-like;TcCLB.511635.10 | Trypanosoma cruzi CL Brener Non-Esmeraldo-like	2.3	0.00025365	417.185	1248.53	4.3285e-45	30	28137000	46437000	8386100	125920000	115340000	77943000
STDLLLQK	Unmodified	histone H3, putative	TcCLB.505931.40 | Trypanosoma cruzi CL Brener Esmeraldo-like;TcCLB.507817.18 | Trypanosoma cruzi CL Brener Esmeraldo-like;TcCLB.507817.9 | Trypanosoma cruzi CL Brener Esmeraldo-like;TcCLB.509471.59 | Trypanosoma cruzi CL Brener Non-Esmeraldo-like;TcCLB.509471.68 | Trypanosoma cruzi CL Brener Non-Esmeraldo-like;TcCLB.509471.77 | Trypanosoma cruzi CL Brener Non-Esmeraldo-like;TcCLB.509471.86 | Tryp…	2	-0.023348	459.269	916.523	2.5979e-25	20	233130000	155020000	167410000	279950000	238160000	128360000
STDLLLQKAPFQR	Unmodified	histone H3, putative	TcCLB.505931.40 | Trypanosoma cruzi CL Brener Esmeraldo-like;TcCLB.507817.18 | Trypanosoma cruzi CL Brener Esmeraldo-like;TcCLB.507817.9 | Trypanosoma cruzi CL Brener Esmeraldo-like;TcCLB.509471.59 | Trypanosoma cruzi CL Brener Non-Esmeraldo-like;TcCLB.509471.68 | Trypanosoma cruzi CL Brener Non-Esmeraldo-like;TcCLB.509471.77 | Trypanosoma cruzi CL Brener Non-Esmeraldo-like;TcCLB.509471.86 | Tryp…	2.3	0.045667	758.928	1515.84	1.1349e-13	11	2371500	697550	2183200	1879300	803360	914370
TMKIVNSFVNDLFER	Unmodified	histone H2B, putative	TcCLB.511635.20 | Trypanosoma cruzi CL Brener Non-Esmeraldo-like;TcCLB.511635.10 | Trypanosoma cruzi CL Brener Non-Esmeraldo-like	3	0.31226	604.982	1811.92	0.0011511	1	0	0	0	371850	265000	0
TVTAVDVVNALR	Unmodified	histone H4, putative	TcCLB.507941.150 | Trypanosoma cruzi CL Brener Esmeraldo-like;TcCLB.507941.160 | Trypanosoma cruzi CL Brener Esmeraldo-like;TcCLB.507941.170 | Trypanosoma cruzi CL Brener Esmeraldo-like;TcCLB.508203.20 | Trypanosoma cruzi CL Brener Esmeraldo-like;TcCLB.508203.29 | Trypanosoma cruzi CL Brener Esmeraldo-like;TcCLB.508203.38 | Trypanosoma cruzi CL Brener Esmeraldo-like;TcCLB.508203.47 | Trypanosoma …	2.3	0.007819	629.362	1256.71	2.1109e-105	91	513110000	166800000	147910000	403850000	280120000	187440000
TVTAVDVVNALRK	Unmodified	histone H4, putative	TcCLB.507941.150 | Trypanosoma cruzi CL Brener Esmeraldo-like;TcCLB.507941.160 | Trypanosoma cruzi CL Brener Esmeraldo-like;TcCLB.507941.170 | Trypanosoma cruzi CL Brener Esmeraldo-like;TcCLB.508203.20 | Trypanosoma cruzi CL Brener Esmeraldo-like;TcCLB.508203.29 | Trypanosoma cruzi CL Brener Esmeraldo-like;TcCLB.508203.38 | Trypanosoma cruzi CL Brener Esmeraldo-like;TcCLB.508203.47 | Trypanosoma …	2	0.021619	693.409	1384.8	9.0748e-32	43	6429600	7902000	14824000	91498000	114440000	26694000
TVTLAVR	Unmodified	histone H2A, putative	TcCLB.509207.11 | Trypanosoma cruzi CL Brener Non-Esmeraldo-like;TcCLB.509207.20 | Trypanosoma cruzi CL Brener Non-Esmeraldo-like;TcCLB.511809.135 | Trypanosoma cruzi CL Brener Non-Esmeraldo-like;TcCLB.511809.140 | Trypanosoma cruzi CL Brener Non-Esmeraldo-like;TcCLB.511817.140 | Trypanosoma cruzi CL Brener Non-Esmeraldo-like;TcCLB.511817.161 | Trypanosoma cruzi CL Brener Non-Esmeraldo-like;TcCLB…	2	0.002446	380.24	758.465	0.062415	20	117280000	89024000	77841000	246610000	226130000	88852000
TVTLAVRHDDDLGTLLK	Unmodified	histone H2A, putative	TcCLB.510525.100 | Trypanosoma cruzi CL Brener Esmeraldo-like;TcCLB.510525.110 | Trypanosoma cruzi CL Brener Esmeraldo-like;TcCLB.510525.80 | Trypanosoma cruzi CL Brener Esmeraldo-like;TcCLB.510525.90 | Trypanosoma cruzi CL Brener Esmeraldo-like	3	0.17997	623.014	1866.02	0.021989	1	0	0	0	615900	316640	150120
TVTLAVRHDDDLGTLLKDVTLSR	Unmodified	histone H2A, putative	TcCLB.510525.100 | Trypanosoma cruzi CL Brener Esmeraldo-like;TcCLB.510525.110 | Trypanosoma cruzi CL Brener Esmeraldo-like;TcCLB.510525.80 | Trypanosoma cruzi CL Brener Esmeraldo-like;TcCLB.510525.90 | Trypanosoma cruzi CL Brener Esmeraldo-like	3	0.48538	846.801	2537.38	3.0816e-96	2	0	0	0	754510	429020	463980
VGSLLRR	Unmodified	histone H2A, putative	TcCLB.509207.11 | Trypanosoma cruzi CL Brener Non-Esmeraldo-like;TcCLB.509207.20 | Trypanosoma cruzi CL Brener Non-Esmeraldo-like;TcCLB.511809.135 | Trypanosoma cruzi CL Brener Non-Esmeraldo-like;TcCLB.511809.140 | Trypanosoma cruzi CL Brener Non-Esmeraldo-like;TcCLB.511817.140 | Trypanosoma cruzi CL Brener Non-Esmeraldo-like;TcCLB.511817.161 | Trypanosoma cruzi CL Brener Non-Esmeraldo-like;TcCLB…	2	-0.0060827	400.759	799.503	5.5621e-16	8	837750	811880	859430	8837600	6666600	2846800
VLSSFIEDMYSK	Unmodified	histone H2B variant, putative	TcCLB.506779.150 | Trypanosoma cruzi CL Brener Esmeraldo-like;TcCLB.511153.64 | Trypanosoma cruzi CL Brener Non-Esmeraldo-like	2	-0.13004	709.847	1417.68	4.9692e-73	7	0	0	0	1653800	1231100	2149800
WDLYIHR	Unmodified	histone H2B variant, putative	TcCLB.506779.150 | Trypanosoma cruzi CL Brener Esmeraldo-like;TcCLB.511153.64 | Trypanosoma cruzi CL Brener Non-Esmeraldo-like	2	0.32656	501.761	1001.51	0.0093225	2	0	0	0	1353000	915310	1230700
WRPGTVALR	Unmodified	histone H3, putative	TcCLB.505931.40 | Trypanosoma cruzi CL Brener Esmeraldo-like; TcCLB.507817.18 | Trypanosoma cruzi CL Brener Esmeraldo-like;TcCLB.507817.9 | Trypanosoma cruzi CL Brener Esmeraldo-like;TcCLB.509471.59 | Trypanosoma cruzi CL Brener Non-Esmeraldo-like;TcCLB.509471.68 | Trypanosoma cruzi CL Brener Non-Esmeraldo-like;TcCLB.509471.77 | Trypanosoma cruzi CL Brener Non-Esmeraldo-like;TcCLB.509471.86 | Try…	3	NaN	352.542	1054.6	0.020013	1	0	0	0	0	0	0
YNASREEAYAK	Unmodified	histone H2B variant, putative	TcCLB.506779.150 | Trypanosoma cruzi CL Brener Esmeraldo-like;TcCLB.511153.64 | Trypanosoma cruzi CL Brener Non-Esmeraldo-like	2	0.04707	651.31	1300.6	0.0008578	3	0	0	0	20740000	21765000	7552900
YQSSTEFLIAK	Unmodified	histone H3 variant, putative	TcCLB.506503.150 | Trypanosoma cruzi CL Brener Esmeraldo-like;TcCLB.507033.20 | Trypanosoma cruzi CL Brener Non-Esmeraldo-like	2	-0.047354	643.835	1285.66	0.24753	2	0	0	0	1464700	1099700	1095100
* from MQ analysis of epimastigotes-only data.
** from analysis of chromatin extracts based on Toro's protocol.

## Sheet: TableS4
Table S4. Histone peptides identified using PEAKS Studio.
Peptide	PTM	Description	Protein IDs	AScore	-10lgP	Mass	Length	ppm	m/z	RT	Area	Scan	#Spec
AAAKKPAAKK		histone H1, putative	TcCLB.506369.70		32.92	982.629	10	0.4	492.322	7.96		F24:1043	1
KASPK		histone H1, putative	TcCLB.506369.70:TcCLB.510225.10		15.65	529.322	5	1.6	265.669	2.06	6750	F23:270	1
KKPAAAKK		histone H1, putative	TcCLB.506369.70:TcCLB.510225.10		17.99	840.554	8	2.7	421.286	7.58		F31:994	1
KKPAAAK		histone H1, putative	TcCLB.506369.70:TcCLB.510225.10		18.02	712.46	7	2.4	357.238	7.58		F31:993	1
EIVSNLK		histone H3 variant, putative	TcCLB.507033.20:TcCLB.506503.150		41.79	801.46	7	-2.7	401.736	16.92	928000	F20:2188	1
EIVSNLK(+14.02)DSFR	Methylation_KR	histone H3 variant, putative	TcCLB.507033.20:TcCLB.506503.150	K7:Methylation_KR:77;13	62.23	1320.7	11	-4.8	661.356	26.86		F24:3641	1
ISGVIYDEVRGVIK		histone H4, putative	TcCLB.507941.170:TcCLB.507941.160:TcCLB.508203.20:TcCLB.508203.47:TcCLB.510351.11:TcCLB.510351.31:TcCLB.507941.150:TcCLB.508203.56:TcCLB.508203.29:TcCLB.510351.20:TcCLB.508203.38		32.92	1546.87	14	-1.8	516.63	35.86	586000	F25:4954	1
RISGVIYDEVRGVIK		histone H4, putative	TcCLB.507941.170:TcCLB.507941.160:TcCLB.508203.20:TcCLB.508203.47:TcCLB.510351.11:TcCLB.510351.31:TcCLB.507941.150:TcCLB.508203.56:TcCLB.508203.29:TcCLB.510351.20:TcCLB.508203.38		48.72	1702.97	15	-2.8	568.663	37.83	117000	F32:4379	1
GVIKSFVEGVVR		histone H4, putative	TcCLB.507941.170:TcCLB.507941.160:TcCLB.508203.20:TcCLB.508203.47:TcCLB.510351.11:TcCLB.510351.31:TcCLB.507941.150:TcCLB.508203.56:TcCLB.508203.29:TcCLB.510351.20:TcCLB.508203.38		63.47	1288.75	12	-0.1	645.382	36.18	194000	F26:3884	1
RENVR		histone H4, putative	TcCLB.507941.170:TcCLB.507941.160:TcCLB.508203.20:TcCLB.508203.47:TcCLB.510351.11:TcCLB.510351.31:TcCLB.507941.150:TcCLB.508203.56:TcCLB.508203.29:TcCLB.510351.20:TcCLB.508203.38:TcCLB.511681.20:TcCLB.508739.60		15.48	672.367	5	-3.9	337.189	11.06	556000	F24:1392	1
VEGVVR		histone H4, putative	TcCLB.507941.170:TcCLB.507941.160:TcCLB.508203.20:TcCLB.508203.47:TcCLB.510351.11:TcCLB.510351.31:TcCLB.507941.150:TcCLB.508203.56:TcCLB.508203.29:TcCLB.510351.20:TcCLB.508203.38:TcCLB.511681.20:TcCLB.508739.60		25.29	657.381	6	2.9	329.699	12.42	1180000	F33:1437	1
VDVVNALRK		histone H4, putative	TcCLB.507941.170:TcCLB.507941.160:TcCLB.508203.20:TcCLB.508203.47:TcCLB.510351.11:TcCLB.510351.31:TcCLB.507941.150:TcCLB.508203.56:TcCLB.508203.29:TcCLB.510351.20:TcCLB.508203.38:TcCLB.511681.20:TcCLB.508739.60		25.46	1012.6	9	2.8	338.543	24.76	108000	F15:3071	1
TVTAVDVVN		histone H4, putative	TcCLB.507941.170:TcCLB.507941.160:TcCLB.508203.20:TcCLB.508203.47:TcCLB.510351.11:TcCLB.510351.31:TcCLB.507941.150:TcCLB.508203.56:TcCLB.508203.29:TcCLB.510351.20:TcCLB.508203.38:TcCLB.511681.20:TcCLB.508739.60		32.44	916.487	9	-0.2	459.25	24.97	79500	F19:2659	1
TAYTEYSR		histone H4, putative	TcCLB.507941.170:TcCLB.507941.160:TcCLB.508203.20:TcCLB.508203.47:TcCLB.510351.11:TcCLB.510351.31:TcCLB.507941.150:TcCLB.508203.56:TcCLB.508203.29:TcCLB.510351.20:TcCLB.508203.38:TcCLB.511681.20:TcCLB.508739.60		54.62	989.445	8	-0.5	495.73	15.77	735000	F33:1851	1
EIRQFQRSTDLLLQK		histone H3, putative	TcCLB.509471.59:TcCLB.509471.86:TcCLB.509471.77:TcCLB.509471.68		15.71	1874.04	15	9.4	938.035	36.96	133000	F40:4224	1
APKAPGAAT(+79.97)GVK	Phosphorylation (STY)	histone H3, putative	TcCLB.509471.59:TcCLB.509471.86:TcCLB.509471.77:TcCLB.509471.68	T9:Phosphorylation (STY):1000;00	16.06	1146.58	12	4.7	383.202	13.71	79300	F34:1634	1
K(+42.01)(+42.01)KAPK(+42.01)APGAAT	Acetylation (N-term); Acetylation (K)	histone H3, putative	TcCLB.509471.59:TcCLB.509471.86:TcCLB.509471.77:TcCLB.509471.68	K1:Acetylation (N-term):1000;00;K1:Acetylation (K):33;98;K5:Acetylation (K):56;34	16.08	1164.65	11	9	583.338	24.9	210000	F8:3170	1
ETARSK		histone H3, putative	TcCLB.509471.59:TcCLB.509471.86:TcCLB.509471.77:TcCLB.509471.68		16.73	690.366	6	2.8	346.191	7.54		F27:985	1
PKAPGAATGVK		histone H3, putative	TcCLB.509471.59:TcCLB.509471.86:TcCLB.509471.77:TcCLB.509471.68		18.39	995.576	11	2.2	332.867	11.27	77800	F30:1360	1
IHSGR		histone H3, putative	TcCLB.509471.59:TcCLB.509471.86:TcCLB.509471.77:TcCLB.509471.68		20.54	568.308	5	-1.8	285.161	14.19	7470000	F38:1675	1
HAQRR		histone H3, putative	TcCLB.509471.59:TcCLB.509471.86:TcCLB.509471.77:TcCLB.509471.68		26.69	666.367	5	2.7	334.192	7.56		F31:991	1
RTITSK		histone H3, putative	TcCLB.509471.59:TcCLB.509471.86:TcCLB.509471.77:TcCLB.509471.68		31.24	704.418	6	2.4	353.217	7.71		F30:1010	1
FQSSAILAAQE		histone H3, putative	TcCLB.509471.59:TcCLB.509471.86:TcCLB.509471.77:TcCLB.509471.68		35.13	1163.58	11	-1.6	582.798	30.46		F19:3165	1
SKKAPKAPGAATGVK		histone H3, putative	TcCLB.509471.59:TcCLB.509471.86:TcCLB.509471.77:TcCLB.509471.68		37.16	1409.84	15	0.2	705.925	12.23		F31:1459	1
QEATESYVVSLLADTNR		histone H3, putative	TcCLB.509471.59:TcCLB.509471.86:TcCLB.509471.77:TcCLB.509471.68		37.23	1894.93	17	3.5	632.652	45.46	408000	F27:5817	1
DDLGTLLK		histone H2A, putative	TcCLB.510525.110:TcCLB.510525.90		44.57	873.481	8	-2.2	437.747	32.03	96100	F20:4074	1
AASQQAK		histone H2A, putative	TcCLB.510525.110:TcCLB.510525.90:TcCLB.511817.161:TcCLB.511817.140:TcCLB.509207.11:TcCLB.511817.171:TcCLB.511809.135:TcCLB.509207.20:TcCLB.511809.140:TcCLB.511817.151:TcCLB.508321.21		29.33	702.366	7	2.4	352.191	2.18		F33:285	1
ALAKK		histone H2A, putative	TcCLB.510525.110:TcCLB.510525.90:TcCLB.511817.161:TcCLB.511817.140:TcCLB.509207.11:TcCLB.511817.171:TcCLB.511809.135:TcCLB.509207.20:TcCLB.511809.140:TcCLB.511817.180		16.33	529.359	5	-2	265.686	40.71	4470000	F23:5347	1
VTLAVR		histone H2A, putative	TcCLB.510525.110:TcCLB.510525.90:TcCLB.511817.161:TcCLB.511817.140:TcCLB.509207.11:TcCLB.511817.171:TcCLB.511809.135:TcCLB.509207.20:TcCLB.511809.140:TcCLB.511817.180:TcCLB.511817.151:TcCLB.508321.21		16.44	657.417	6	0.1	329.716	16.22	411000	F22:2070	1
IGASGAVYMAAVLEYLTAEL		histone H2A, putative	TcCLB.510525.110:TcCLB.510525.90:TcCLB.511817.161:TcCLB.511817.140:TcCLB.509207.11:TcCLB.511817.171:TcCLB.511809.135:TcCLB.509207.20:TcCLB.511809.140:TcCLB.511817.180:TcCLB.511817.151:TcCLB.508321.21		16.6	2041.04	20	1.6	681.356	52.55	387000	F4:5769	1
GQYAR		histone H2A, putative	TcCLB.510525.110:TcCLB.510525.90:TcCLB.511817.161:TcCLB.511817.140:TcCLB.509207.11:TcCLB.511817.171:TcCLB.511809.135:TcCLB.509207.20:TcCLB.511809.140:TcCLB.511817.180:TcCLB.511817.151:TcCLB.508321.21		25.38	593.292	5	2.9	297.654	7.89	13000	F33:1024	1
DVTLSRG		histone H2A, putative	TcCLB.510525.110:TcCLB.510525.90:TcCLB.511817.161:TcCLB.511817.140:TcCLB.509207.11:TcCLB.511817.171:TcCLB.511809.135:TcCLB.509207.20:TcCLB.511809.140:TcCLB.511817.180:TcCLB.511817.151:TcCLB.508321.21		27	746.392	7	0.6	374.204	15.31		F33:1792	1
RSAKAGLIFPVGR		histone H2A, putative	TcCLB.510525.110:TcCLB.510525.90:TcCLB.511817.161:TcCLB.511817.140:TcCLB.509207.11:TcCLB.511817.171:TcCLB.511809.135:TcCLB.509207.20:TcCLB.511809.140:TcCLB.511817.180:TcCLB.511817.151:TcCLB.508321.21		31.04	1370.81	13	-5.3	457.943	32.77	206000	F38:3780	1
RGQYAR		histone H2A, putative	TcCLB.510525.110:TcCLB.510525.90:TcCLB.511817.161:TcCLB.511817.140:TcCLB.509207.11:TcCLB.511817.171:TcCLB.511809.135:TcCLB.509207.20:TcCLB.511809.140:TcCLB.511817.180:TcCLB.511817.151:TcCLB.508321.21		31.3	749.393	6	2.1	375.705	8.44	15600	F31:1104	1
TVTLAVRH		histone H2A, putative	TcCLB.510525.110:TcCLB.510525.90:TcCLB.511817.161:TcCLB.511817.140:TcCLB.509207.11:TcCLB.511817.171:TcCLB.511809.135:TcCLB.509207.20:TcCLB.511809.140:TcCLB.511817.180:TcCLB.511817.151:TcCLB.508321.21		35.52	895.524	8	2.5	448.77	22.26	53500	F37:2427	1
KDVTLSR		histone H2A, putative	TcCLB.510525.110:TcCLB.510525.90:TcCLB.511817.161:TcCLB.511817.140:TcCLB.509207.11:TcCLB.511817.171:TcCLB.511809.135:TcCLB.509207.20:TcCLB.511809.140:TcCLB.511817.180:TcCLB.511817.151:TcCLB.508321.21		36.48	817.466	7	2.1	409.741	12.07	105000	F35:1446	1
AELLELSVK		histone H2A, putative	TcCLB.510525.110:TcCLB.510525.90:TcCLB.511817.161:TcCLB.511817.140:TcCLB.509207.11:TcCLB.511817.171:TcCLB.511809.135:TcCLB.509207.20:TcCLB.511809.140:TcCLB.511817.180:TcCLB.511817.151:TcCLB.508321.21		46.4	1000.58	9	1.8	501.298	34.81	79200	F33:4509	1
RPASATRKASGGK(+42.01)K	Acetylation (K)	histone H2B variant, putative	TcCLB.511153.64:TcCLB.506779.150	K13:Acetylation (K):0;00	18.37	1455.83	14	9.7	486.288	51.67	2540000	F23:6544	1
GGKRPLPMGGK		histone H2B variant, putative	TcCLB.511153.64:TcCLB.506779.150		63.04	1096.62	11	1.5	549.317	17.51	50900	F37:1978	1
AGAAAK		histone H2A, putative	TcCLB.511323.40		17.25	487.275	6	3.3	244.646	7.85	13300	F33:1020	1
LKDGLNRK		histone H2A, putative	TcCLB.511323.40		22.48	942.561	8	2.7	472.289	12.57		F11:1552	1
IVNATIAR		histone H2A, putative	TcCLB.511323.40		36.93	856.513	8	2.4	429.265	18.71	308000	F34:2258	1
GDEELNQIVNATIAR		histone H2A, putative	TcCLB.511323.40		72.58	1641.83	15	0.4	821.924	39.65	106000	F20:4820	1
NNHMSMSGR		histone H2B, putative	TcCLB.511635.10:TcCLB.511635.20		37.34	1032.42	9	-5.1	517.216	13.02	827000	F25:1681	1
LVLPADLAKHAMAEGTKAVSHASS		histone H2B, putative	TcCLB.511635.10:TcCLB.511635.20		37.9	2403.26	24	1.2	802.094	40.24	320000	F32:4608	1
IVNSFVNDL		histone H2B, putative	TcCLB.511635.10:TcCLB.511635.20		42.54	1019.53	9	-1.6	510.771	40.62	1570000	F25:5592	1
NSFVNDLFER		histone H2B, putative	TcCLB.511635.10:TcCLB.511635.20		50.54	1239.59	10	3.4	620.804	44.84	44400	F35:4794	1
ALAEK		histone H2A, putative	TcCLB.511817.151		16.89	530.306	5	0.6	266.161	8.04		F20:1055	1
TVTLAVRHDDDLGM		histone H2A, putative	TcCLB.511817.161:TcCLB.511817.140:TcCLB.509207.11:TcCLB.511817.171:TcCLB.511809.135:TcCLB.509207.20:TcCLB.511809.140:TcCLB.511817.180:TcCLB.511817.151:TcCLB.508321.21		15.32	1541.75	14	1.9	514.925	29.44		F27:3929	1
DDDLGMLLK		histone H2A, putative	TcCLB.511817.161:TcCLB.511817.140:TcCLB.509207.11:TcCLB.511817.171:TcCLB.511809.135:TcCLB.509207.20:TcCLB.511809.140:TcCLB.511817.180:TcCLB.511817.151:TcCLB.508321.21		49.72	1018.5	9	3	510.259	39.35	99300	F33:5037	1
KPAAK		histone H1, putative	TcCLB.506369.70:TcCLB.510225.10		16.83	513.327	5	1.7	257.671	2.05	18600	F23:268	2
SDAAVPPK		histone H1, putative	TcCLB.506369.70:TcCLB.510225.10		40.72	783.413	8	1.4	392.714	9.02	520000	F19:1163	2
QLALK		histone H3 variant, putative	TcCLB.507033.20:TcCLB.506503.150		21.15	571.369	5	2.2	286.693	13.87	824000	F39:1597	2
SGVIYDEVR		histone H4, putative	TcCLB.507941.170:TcCLB.507941.160:TcCLB.508203.20:TcCLB.508203.47:TcCLB.510351.11:TcCLB.510351.31:TcCLB.507941.150:TcCLB.508203.56:TcCLB.508203.29:TcCLB.510351.20:TcCLB.508203.38		47.89	1036.52	9	2.7	519.268	23.72	276000	F33:2998	2
AVDVVNALRK		histone H4, putative	TcCLB.507941.170:TcCLB.507941.160:TcCLB.508203.20:TcCLB.508203.47:TcCLB.510351.11:TcCLB.510351.31:TcCLB.507941.150:TcCLB.508203.56:TcCLB.508203.29:TcCLB.510351.20:TcCLB.508203.38:TcCLB.511681.20:TcCLB.508739.60		42.95	1083.64	10	1.1	542.828	26.26	134000	F15:3253	2
VDVVNALR		histone H4, putative	TcCLB.507941.170:TcCLB.507941.160:TcCLB.508203.20:TcCLB.508203.47:TcCLB.510351.11:TcCLB.510351.31:TcCLB.507941.150:TcCLB.508203.56:TcCLB.508203.29:TcCLB.510351.20:TcCLB.508203.38:TcCLB.511681.20:TcCLB.508739.60		46.02	884.508	8	-1.9	443.26	27.26	1110000	F1:3873	2
VTAVDVVNALR		histone H4, putative	TcCLB.507941.170:TcCLB.507941.160:TcCLB.508203.20:TcCLB.508203.47:TcCLB.510351.11:TcCLB.510351.31:TcCLB.507941.150:TcCLB.508203.56:TcCLB.508203.29:TcCLB.510351.20:TcCLB.508203.38:TcCLB.511681.20:TcCLB.508739.60		58.95	1155.66	11	2.2	578.839	39.85	822000	F33:5096	2
EVSGAQK		histone H3, putative	TcCLB.509471.59:TcCLB.509471.86:TcCLB.509471.77:TcCLB.509471.68		19.73	717.366	7	3	359.691	8.05		F19:1056	2
SKETAR		histone H3, putative	TcCLB.509471.59:TcCLB.509471.86:TcCLB.509471.77:TcCLB.509471.68		19.79	690.366	6	2.4	346.191	1.64	8120	F28:214	2
SAILAAQEATESYVVSLLADTNR		histone H3, putative	TcCLB.509471.59:TcCLB.509471.86:TcCLB.509471.77:TcCLB.509471.68		20.02	2421.24	23	4.9	808.091	59.86		F33:6892	2
DLLLQK		histone H3, putative	TcCLB.509471.59:TcCLB.509471.86:TcCLB.509471.77:TcCLB.509471.68		29.11	728.443	6	0.7	365.229	24.31		F33:3083	2
RSTDLLLQK		histone H3, putative	TcCLB.509471.59:TcCLB.509471.86:TcCLB.509471.77:TcCLB.509471.68		31.26	1072.62	9	1.9	537.32	23.35	151000	F29:2769	2
PGAATGVK		histone H3, putative	TcCLB.509471.59:TcCLB.509471.86:TcCLB.509471.77:TcCLB.509471.68		42.97	699.391	8	1.4	350.704	15.04	168000	F27:1838	2
VSLLADTNR		histone H3, putative	TcCLB.509471.59:TcCLB.509471.86:TcCLB.509471.77:TcCLB.509471.68		50.1	987.535	9	1.3	494.775	25.96	228000	F34:3147	2
ATESYVVSLLADTNR		histone H3, putative	TcCLB.509471.59:TcCLB.509471.86:TcCLB.509471.77:TcCLB.509471.68		54.99	1637.83	15	3.4	546.951	42.78		F33:5401	2
HDDDLGTLL		histone H2A, putative	TcCLB.510525.110:TcCLB.510525.90		22.39	997.472	9	1.6	499.744	36.06	1120000	F33:4660	2
LGTLLK		histone H2A, putative	TcCLB.510525.110:TcCLB.510525.90		22.67	643.427	6	-3.5	322.719	24.48		F22:3260	2
RHDDDLGTLLK		histone H2A, putative	TcCLB.510525.110:TcCLB.510525.90		47.61	1281.67	11	3.2	428.231	27.47	162000	F28:3410	2
DDDLGTLLK		histone H2A, putative	TcCLB.510525.110:TcCLB.510525.90		51.27	988.508	9	1.5	495.262	34.57	183000	F27:4607	2
SSK(+42.01)KAR(+14.02)ATPSA	Acetylation (K); Methylation_KR	histone H2A, putative	TcCLB.510525.110:TcCLB.510525.90:TcCLB.511817.161:TcCLB.511817.140:TcCLB.509207.11:TcCLB.511817.171:TcCLB.511809.135:TcCLB.509207.20:TcCLB.511809.140:TcCLB.511817.180:TcCLB.511817.151:TcCLB.508321.21	K3:Acetylation (K):9;34;R6:Methylation_KR:0;00	26.23	1158.64	11	1	580.326	21.34	753000	F40:2555	2
LELSVK		histone H2A, putative	TcCLB.510525.110:TcCLB.510525.90:TcCLB.511817.161:TcCLB.511817.140:TcCLB.509207.11:TcCLB.511817.171:TcCLB.511809.135:TcCLB.509207.20:TcCLB.511809.140:TcCLB.511817.180:TcCLB.511817.151:TcCLB.508321.21		29.36	687.417	6	-0.5	344.716	21.91	412000	F27:2868	2
ARATPSA		histone H2A, putative	TcCLB.510525.110:TcCLB.510525.90:TcCLB.511817.161:TcCLB.511817.140:TcCLB.509207.11:TcCLB.511817.171:TcCLB.511809.135:TcCLB.509207.20:TcCLB.511809.140:TcCLB.511817.180:TcCLB.511817.151:TcCLB.508321.21		36.73	672.356	7	1.9	337.186	8.21	146000	F27:1052	2
KAGLIFPVGR		histone H2A, putative	TcCLB.510525.110:TcCLB.510525.90:TcCLB.511817.161:TcCLB.511817.140:TcCLB.509207.11:TcCLB.511817.171:TcCLB.511809.135:TcCLB.509207.20:TcCLB.511809.140:TcCLB.511817.180:TcCLB.511817.151:TcCLB.508321.21		49.04	1056.64	10	-2.1	529.328	28.38	222000	F26:3146	2
TAELLELSVK		histone H2A, putative	TcCLB.510525.110:TcCLB.510525.90:TcCLB.511817.161:TcCLB.511817.140:TcCLB.509207.11:TcCLB.511817.171:TcCLB.511809.135:TcCLB.509207.20:TcCLB.511809.140:TcCLB.511817.180:TcCLB.511817.151:TcCLB.508321.21		56.81	1101.63	10	0.9	551.822	35.66	836000	F33:4613	2
AAVLEYLTAELLELSVK		histone H2A, putative	TcCLB.510525.110:TcCLB.510525.90:TcCLB.511817.161:TcCLB.511817.140:TcCLB.509207.11:TcCLB.511817.171:TcCLB.511809.135:TcCLB.509207.20:TcCLB.511809.140:TcCLB.511817.180:TcCLB.511817.151:TcCLB.508321.21		58.1	1861.04	17	1.4	621.356	60.33	152000	F38:6309	2
NASREEAYAK		histone H2B variant, putative	TcCLB.511153.64:TcCLB.506779.150		17.29	1137.54	10	8.3	569.783	64.8	28700	F20:7393	2
LKDGLNR		histone H2A, putative	TcCLB.511323.40		18.48	814.466	7	1.6	408.241	13.4		F10:1590	2
ELQTAVRL		histone H2B, putative	TcCLB.511635.10:TcCLB.511635.20		28.65	928.534	8	-0.8	465.274	28.36	143000	F27:3796	2
HAMAEGTKA		histone H2B, putative	TcCLB.511635.10:TcCLB.511635.20		28.88	914.428	9	-0.1	458.221	8.72		F35:1099	2
TAKK(+28.03)PAAK	Dimethylation_KR	histone H1, putative	TcCLB.506369.70	K4:Dimethylation_KR:14;02	26.81	841.538	8	3.7	421.778	8	18700	F37:1048	3
SDAAVPPKKAS(+79.97)PKK	Phosphorylation (STY)	histone H1, putative	TcCLB.506369.70:TcCLB.510225.10	S11:Phosphorylation (STY):91;60	20.26	1502.79	14	2.8	752.402	7.95		F28:1028	3
KPAAKK		histone H1, putative	TcCLB.506369.70:TcCLB.510225.10		22.76	641.422	6	2.8	321.719	7.56		F37:991	3
VTVYPK		histone H3 variant, putative	TcCLB.507033.20:TcCLB.506503.150		37.59	705.406	6	-2	353.71	13.5	2890000	F20:1693	3
EIVSNLK(+28.03)DSFR	Dimethylation_KR	histone H3 variant, putative	TcCLB.507033.20:TcCLB.506503.150	K7:Dimethylation_KR:109;97	57.69	1334.72	11	-1	668.366	26.98	694000	F24:3658	3
RISGVIYDE		histone H4, putative	TcCLB.507941.170:TcCLB.507941.160:TcCLB.508203.20:TcCLB.508203.47:TcCLB.510351.11:TcCLB.510351.31:TcCLB.507941.150:TcCLB.508203.56:TcCLB.508203.29:TcCLB.510351.20:TcCLB.508203.38		33.67	1050.53	9	-0.1	526.274	27.13	267000	F34:3285	3
KKTVTAVDVVNALRK		histone H4, putative	TcCLB.507941.170:TcCLB.507941.160:TcCLB.508203.20:TcCLB.508203.47:TcCLB.510351.11:TcCLB.510351.31:TcCLB.507941.150:TcCLB.508203.56:TcCLB.508203.29:TcCLB.510351.20:TcCLB.508203.38:TcCLB.511681.20:TcCLB.508739.60		25.8	1640.99	15	2.3	548.006	29.34	77000	F32:3464	3
SGEAK(+42.01)GTQK(+42.01)R	Acetylation (K)	histone H4, putative	TcCLB.507941.170:TcCLB.507941.160:TcCLB.508203.20:TcCLB.508203.47:TcCLB.510351.11:TcCLB.510351.31:TcCLB.507941.150:TcCLB.508203.56:TcCLB.508203.29:TcCLB.510351.20:TcCLB.508203.38:TcCLB.511681.20:TcCLB.508739.60	K5:Acetylation (K):1000;00;K9:Acetylation (K):1000;00	33.52	1144.58	10	1.8	573.3	9.19	1570000	F20:1169	3
TVTAVDVVNA		histone H4, putative	TcCLB.507941.170:TcCLB.507941.160:TcCLB.508203.20:TcCLB.508203.47:TcCLB.510351.11:TcCLB.510351.31:TcCLB.507941.150:TcCLB.508203.56:TcCLB.508203.29:TcCLB.510351.20:TcCLB.508203.38:TcCLB.511681.20:TcCLB.508739.60		47.27	987.524	10	1.6	494.77	29.2	486000	F33:3767	3
TVTAVDVVNAL		histone H4, putative	TcCLB.507941.170:TcCLB.507941.160:TcCLB.508203.20:TcCLB.508203.47:TcCLB.510351.11:TcCLB.510351.31:TcCLB.507941.150:TcCLB.508203.56:TcCLB.508203.29:TcCLB.510351.20:TcCLB.508203.38:TcCLB.511681.20:TcCLB.508739.60		49.85	1100.61	11	3.6	551.313	44.18	1570000	F33:5536	3
LREIR		histone H3, putative	TcCLB.509471.59:TcCLB.509471.86:TcCLB.509471.77:TcCLB.509471.68		15.59	685.423	5	1.7	343.72	14.21	708000	F43:1700	3
KAPFQR		histone H3, putative	TcCLB.509471.59:TcCLB.509471.86:TcCLB.509471.77:TcCLB.509471.68		21.08	745.423	6	2	373.72	17.18	460000	F5:1946	3
SLLADTNR		histone H3, putative	TcCLB.509471.59:TcCLB.509471.86:TcCLB.509471.77:TcCLB.509471.68		37.16	888.466	8	1.3	445.241	18.35		F27:2328	3
RPGTVALR		histone H3, putative	TcCLB.509471.59:TcCLB.509471.86:TcCLB.509471.77:TcCLB.509471.68		40.03	868.524	8	1.2	435.27	18.52	42800	F43:2094	3
LAAQEATESYVVSLLADTNR		histone H3, putative	TcCLB.509471.59:TcCLB.509471.86:TcCLB.509471.77:TcCLB.509471.68		54.54	2150.09	20	3.2	717.705	51	235000	F27:6319	3
APGAATGVKHAQR		histone H3, putative	TcCLB.509471.59:TcCLB.509471.86:TcCLB.509471.77:TcCLB.509471.68		64.19	1262.68	13	1.3	632.35	10.16		F31:1278	3
KPAVKKPAAK		histone H1, putative	TcCLB.510225.10		31.91	1036.68	10	1.2	519.346	8.34	57500	F5:1085	3
AVSHASS		histone H2B, putative	TcCLB.511635.10:TcCLB.511635.20		22.79	657.308	7	1.5	329.662	6.59		F27:862	3
LPADLAK		histone H2B, putative	TcCLB.511635.10:TcCLB.511635.20		30.17	726.428	7	-4.9	364.219	31.69	130000	F20:4040	3
RTLGAR		histone H2B, putative	TcCLB.511635.10:TcCLB.511635.20		32.39	672.403	6	2.1	337.209	7.64		F38:999	3
SSSANRK		histone H2B, putative	TcCLB.511635.10:TcCLB.511635.20		33.5	748.383	7	0.7	375.199	1.92	13600	F23:252	3
SINNHMSM		histone H2B, putative	TcCLB.511635.10:TcCLB.511635.20		40.98	932.385	8	-3.6	467.198	17.61	74000	F22:2274	3
GKILYGYE		histone H4, putative	TcCLB.511681.20:TcCLB.508739.60		47.4	941.486	8	-1.1	471.75	26.94	189000	F28:3347	3
TVTLAVRHDDDLGMLLK		histone H2A, putative	TcCLB.511817.161:TcCLB.511817.140:TcCLB.509207.11:TcCLB.511817.171:TcCLB.511809.135:TcCLB.509207.20:TcCLB.511809.140:TcCLB.511817.180:TcCLB.511817.151:TcCLB.508321.21		45	1896.01	17	-4.8	633.009	33.92	1210000	F25:4690	3
HDDDLGMLLKDVTL		histone H2A, putative	TcCLB.511817.161:TcCLB.511817.140:TcCLB.509207.11:TcCLB.511817.171:TcCLB.511809.135:TcCLB.509207.20:TcCLB.511809.140:TcCLB.511817.180:TcCLB.511817.151:TcCLB.508321.21		57.9	1583.79	14	3.8	792.904	52.12	105000	F27:6414	3
YQSSTEFLIAK		histone H3 variant, putative	TcCLB.507033.20:TcCLB.506503.150		67.31	1285.66	11	-0.2	643.835	29.68	79200	F26:3271	4
LRENVR		histone H4, putative	TcCLB.507941.170:TcCLB.507941.160:TcCLB.508203.20:TcCLB.508203.47:TcCLB.510351.11:TcCLB.510351.31:TcCLB.507941.150:TcCLB.508203.56:TcCLB.508203.29:TcCLB.510351.20:TcCLB.508203.38:TcCLB.511681.20:TcCLB.508739.60		17.6	785.451	6	-4.2	393.731	11.05	2890000	F24:1391	4
VTIQPKD		histone H3, putative	TcCLB.509471.59:TcCLB.509471.86:TcCLB.509471.77:TcCLB.509471.68		22.47	799.444	7	2.3	400.73	14.9	143000	F34:1784	4
QKAPFQR		histone H3, putative	TcCLB.509471.59:TcCLB.509471.86:TcCLB.509471.77:TcCLB.509471.68		22.65	873.482	7	1.3	437.749	18.26	147000	F43:2070	4
LADTNR		histone H3, putative	TcCLB.509471.59:TcCLB.509471.86:TcCLB.509471.77:TcCLB.509471.68		25.04	688.35	6	3	345.183	8.23		F39:1053	4
RTITSKK		histone H3, putative	TcCLB.509471.59:TcCLB.509471.86:TcCLB.509471.77:TcCLB.509471.68		28.57	832.513	7	3	417.265	7.74	45500	F31:1015	4
WRPGTVAL		histone H3, putative	TcCLB.509471.59:TcCLB.509471.86:TcCLB.509471.77:TcCLB.509471.68		29.47	898.502	8	2.3	450.26	32.57	97800	F32:3828	4
VRHDDDLGTLLKDVTLSRG		histone H2A, putative	TcCLB.510525.110:TcCLB.510525.90		43.73	2109.12	19	2.5	704.048	43.87	471000	F38:4891	4
RIGASGAVY		histone H2A, putative	TcCLB.510525.110:TcCLB.510525.90:TcCLB.511817.161:TcCLB.511817.140:TcCLB.509207.11:TcCLB.511817.171:TcCLB.511809.135:TcCLB.509207.20:TcCLB.511809.140:TcCLB.511817.180:TcCLB.511817.151:TcCLB.508321.21		26.37	892.477	9	2.2	447.247	21.15	122000	F34:2571	4
FVNDLFER		histone H2B, putative	TcCLB.511635.10:TcCLB.511635.20		52.31	1038.51	8	2.2	520.265	36.61	799000	F34:4293	4
VNSFVNDLFER		histone H2B, putative	TcCLB.511635.10:TcCLB.511635.20		59.72	1338.66	11	3	670.338	46.56	36300	F35:4937	4
TMKIVNSFVNDLFER		histone H2B, putative	TcCLB.511635.10:TcCLB.511635.20		67.76	1811.92	15	0.3	604.982	46.34	298000	F25:6268	4
VRHDDDLGMLLKDVTLSR		histone H2A, putative	TcCLB.511817.161:TcCLB.511817.140:TcCLB.509207.11:TcCLB.511817.171:TcCLB.511809.135:TcCLB.509207.20:TcCLB.511809.140:TcCLB.511817.180:TcCLB.511817.151:TcCLB.508321.21		47.34	2082.09	18	0.6	521.53	44.67	709000	F6:5285	4
TAKKPAAK(+28.03)KPAAK	Dimethylation_KR	histone H1, putative	TcCLB.506369.70	K8:Dimethylation_KR:21;94	32.37	1336.86	13	2.4	669.437	9.13	320000	F31:1174	5
KILRENVR		histone H4, putative	TcCLB.507941.170:TcCLB.507941.160:TcCLB.508203.20:TcCLB.508203.47:TcCLB.510351.11:TcCLB.510351.31:TcCLB.507941.150:TcCLB.508203.56:TcCLB.508203.29:TcCLB.510351.20:TcCLB.508203.38:TcCLB.511681.20:TcCLB.508739.60		34.56	1026.63	8	1.8	514.323	16.29	1300000	F31:1845	5
KTVTAVDVVNALRK		histone H4, putative	TcCLB.507941.170:TcCLB.507941.160:TcCLB.508203.20:TcCLB.508203.47:TcCLB.510351.11:TcCLB.510351.31:TcCLB.507941.150:TcCLB.508203.56:TcCLB.508203.29:TcCLB.510351.20:TcCLB.508203.38:TcCLB.511681.20:TcCLB.508739.60		49.48	1512.9	14	2.8	505.308	32.97	1090000	F38:3803	5
AVDVVNALR		histone H4, putative	TcCLB.507941.170:TcCLB.507941.160:TcCLB.508203.20:TcCLB.508203.47:TcCLB.510351.11:TcCLB.510351.31:TcCLB.507941.150:TcCLB.508203.56:TcCLB.508203.29:TcCLB.510351.20:TcCLB.508203.38:TcCLB.511681.20:TcCLB.508739.60		52.12	955.545	9	-2.2	478.779	28.89	1210000	F1:4124	5
DIHLAL		histone H3, putative	TcCLB.509471.59:TcCLB.509471.86:TcCLB.509471.77:TcCLB.509471.68		23.19	680.386	6	-0.3	341.2	35.61	75700	F22:4580	5
APK(+42.05)APGAATGVK	Trimethylation_KR	histone H3, putative	TcCLB.509471.59:TcCLB.509471.86:TcCLB.509471.77:TcCLB.509471.68	K3:Trimethylation_KR:110;90	56.64	1108.66	12	-3.8	555.335	9.99	50800	F22:1246	5
AQEATESYVVSLLADTNR		histone H3, putative	TcCLB.509471.59:TcCLB.509471.86:TcCLB.509471.77:TcCLB.509471.68		72.41	1965.96	18	5.9	983.995	47.53	62100	F34:5264	5
AVRHDDDLGTLLKDVTLSRG		histone H2A, putative	TcCLB.510525.110:TcCLB.510525.90		30.87	2180.15	20	2.7	727.727	58.75	2410	F37:5843	5
LAVRHDDDLGTLLK		histone H2A, putative	TcCLB.510525.110:TcCLB.510525.90		48.99	1564.86	14	1.9	783.437	33.03	199000	F16:3924	5
SAKAGLIFPVGR		histone H2A, putative	TcCLB.510525.110:TcCLB.510525.90:TcCLB.511817.161:TcCLB.511817.140:TcCLB.509207.11:TcCLB.511817.171:TcCLB.511809.135:TcCLB.509207.20:TcCLB.511809.140:TcCLB.511817.180:TcCLB.511817.151:TcCLB.508321.21		59.12	1214.71	12	-2.9	608.362	28.73	340000	F26:3179	5
IAS(+79.97)EAATVVRVNKK	Phosphorylation (STY)	histone H2B, putative	TcCLB.511635.10:TcCLB.511635.20	S3:Phosphorylation (STY):28;70	22.32	1564.83	14	-3.8	783.421	31.48	691000	F20:4019	5
VNDLFER		histone H2B, putative	TcCLB.511635.10:TcCLB.511635.20		43.26	891.445	7	0	446.73	26.42	280000	F28:3289	5
RLVLPADLAK		histone H2B, putative	TcCLB.511635.10:TcCLB.511635.20		44.42	1094.68	10	2.1	548.349	34.83	281000	F36:3750	5
RYQSSTEFLIAK		histone H3 variant, putative	TcCLB.507033.20:TcCLB.506503.150		57.34	1441.76	12	-2.3	481.592	24.27	1410000	F25:3306	6
ISGVIYDEVRGV		histone H4, putative	TcCLB.507941.170:TcCLB.507941.160:TcCLB.508203.20:TcCLB.508203.47:TcCLB.510351.11:TcCLB.510351.31:TcCLB.507941.150:TcCLB.508203.56:TcCLB.508203.29:TcCLB.510351.20:TcCLB.508203.38		51.19	1305.69	12	6.1	653.858	23.35		F25:3169	6
SGRVTIQPK		histone H3, putative	TcCLB.509471.59:TcCLB.509471.86:TcCLB.509471.77:TcCLB.509471.68		38.07	984.572	9	2	329.199	13.31	178000	F30:1596	6
HDDDLGTLLKDVTLSRG		histone H2A, putative	TcCLB.510525.110:TcCLB.510525.90		48.33	1853.95	17	2	618.991	52.37	57100	F35:5466	6
TVTLAVRHDDDLGTLLK		histone H2A, putative	TcCLB.510525.110:TcCLB.510525.90		65.07	1866.02	17	-1.2	934.017	31.52	400000	F25:4345	6
LTAELLELSVK		histone H2A, putative	TcCLB.510525.110:TcCLB.510525.90:TcCLB.511817.161:TcCLB.511817.140:TcCLB.509207.11:TcCLB.511817.171:TcCLB.511809.135:TcCLB.509207.20:TcCLB.511809.140:TcCLB.511817.180:TcCLB.511817.151:TcCLB.508321.21		60.44	1214.71	11	-0.7	608.363	40.34	1500000	F27:5293	6
RPLPMGGK		histone H2B variant, putative	TcCLB.511153.64:TcCLB.506779.150		58.06	854.48	8	2.5	428.248	13.13	92300	F38:1558	6
IRGDEELNQIVNATIAR		histone H2A, putative	TcCLB.511323.40		53.66	1911.02	17	2.4	638.015	43.06	354000	F34:4885	6
ISGVMYDEVR		histone H4, putative	TcCLB.511681.20:TcCLB.508739.60		76.82	1167.56	10	-2.1	584.786	25.53	700000	F23:3458	6
DIQLALK		histone H3 variant, putative	TcCLB.507033.20:TcCLB.506503.150		41.91	799.48	7	1.3	400.748	28.52	4090000	F20:3689	7
WRPGTVALR		histone H3, putative	TcCLB.509471.59:TcCLB.509471.86:TcCLB.509471.77:TcCLB.509471.68		49.12	1054.6	9	-3.6	528.307	22.25	305000	F25:3011	7
SSK(+42.01)K(+14.02)ARATPSA	Acetylation (K); Methylation_KR	histone H2A, putative	TcCLB.510525.110:TcCLB.510525.90:TcCLB.511817.161:TcCLB.511817.140:TcCLB.509207.11:TcCLB.511817.171:TcCLB.511809.135:TcCLB.509207.20:TcCLB.511809.140:TcCLB.511817.180:TcCLB.511817.151:TcCLB.508321.21	K3:Acetylation (K):8;69;K4:Methylation_KR:0;00	29.46	1158.64	11	0.5	580.325	18.94	125000	F33:2296	7
RTLGARELQ		histone H2B, putative	TcCLB.511635.10:TcCLB.511635.20		26.67	1042.59	9	-7.8	522.297	17.11	8720000	F35:2027	7
HAMAEGTKAVSHASS		histone H2B, putative	TcCLB.511635.10:TcCLB.511635.20		77.82	1482.69	15	1	742.352	8.82	452000	F24:1137	7
HDDDLGMLLKDVTLSR		histone H2A, putative	TcCLB.511817.161:TcCLB.511817.140:TcCLB.509207.11:TcCLB.511817.171:TcCLB.511809.135:TcCLB.509207.20:TcCLB.511809.140:TcCLB.511817.180:TcCLB.511817.151:TcCLB.508321.21		77.99	1826.92	16	6.7	914.473	51.16	20900	F34:5564	7
GRVTIQPK		histone H3, putative	TcCLB.509471.59:TcCLB.509471.86:TcCLB.509471.77:TcCLB.509471.68		28.64	897.54	8	2.7	449.778	15.93	114000	F17:1844	8
ALAK(+42.01)K(+42.01)HK	Acetylation (K)	histone H2A, putative	TcCLB.510525.110:TcCLB.510525.90:TcCLB.511817.161:TcCLB.511817.140:TcCLB.509207.11:TcCLB.511817.171:TcCLB.511809.135:TcCLB.509207.20:TcCLB.511809.140:TcCLB.511817.180	K4:Acetylation (K):65;81;K5:Acetylation (K):55;92	24.44	878.534	7	1.9	440.275	13.78	14200	F37:1633	8
LVLPADLAKH		histone H2B, putative	TcCLB.511635.10:TcCLB.511635.20		37.53	1075.64	10	3.2	538.828	31.92	377000	F34:3806	8
KIVNSFVNDLFER		histone H2B, putative	TcCLB.511635.10:TcCLB.511635.20		60.94	1579.84	13	2.1	790.927	43.97	359000	F38:4900	8
WRPGTVA		histone H3, putative	TcCLB.509471.59:TcCLB.509471.86:TcCLB.509471.77:TcCLB.509471.68		22.78	785.418	7	3.2	393.718	21.09	308000	F38:2452	9
RVTIQPK		histone H3, putative	TcCLB.509471.59:TcCLB.509471.86:TcCLB.509471.77:TcCLB.509471.68		28.13	840.518	7	1.2	421.267	15.3	354000	F43:1798	9
APKAPGAATGVK		histone H3, putative	TcCLB.509471.59:TcCLB.509471.86:TcCLB.509471.77:TcCLB.509471.68		57.81	1066.61	12	2.2	534.315	11.98	412000	F29:1452	9
FQSSAILAAQEATE		histone H3, putative	TcCLB.509471.59:TcCLB.509471.86:TcCLB.509471.77:TcCLB.509471.68		58.72	1464.71	14	2.5	733.364	35.67	1200000	F39:4442	9
APK(+28.03)APGAATGVK	Dimethylation_KR	histone H3, putative	TcCLB.509471.59:TcCLB.509471.86:TcCLB.509471.77:TcCLB.509471.68	K3:Dimethylation_KR:103;85	59.27	1094.64	12	-2.4	548.328	10.18	195000	F23:1279	9
HDDDLGTLLKDVTL		histone H2A, putative	TcCLB.510525.110:TcCLB.510525.90		63.17	1553.79	14	3.2	777.907	50.78	1680000	F33:6135	9
GGVMPSLNK(+42.01)ALAK(+42.01)K(+42.01)HK	Acetylation (K)	histone H2A, putative	TcCLB.510525.110:TcCLB.510525.90:TcCLB.511817.161:TcCLB.511817.140:TcCLB.509207.11:TcCLB.511817.171:TcCLB.511809.135:TcCLB.509207.20:TcCLB.511809.140:TcCLB.511817.180	K9:Acetylation (K):186;64;K13:Acetylation (K):68;47;K14:Acetylation (K):39;76	68.78	1804	16	1.3	903.01	37.69	141000	F35:4174	9
SRGGVMPSLNK		histone H2A, putative	TcCLB.510525.110:TcCLB.510525.90:TcCLB.511817.161:TcCLB.511817.140:TcCLB.509207.11:TcCLB.511817.171:TcCLB.511809.135:TcCLB.509207.20:TcCLB.511809.140:TcCLB.511817.180:TcCLB.511817.151:TcCLB.508321.21		57.69	1144.6	11	1.7	573.309	19.17	1060000	F38:2229	9
S(+42.01)DAAVPPKKAS(+79.97)PK	Acetylation (N-term); Phosphorylation (STY)	histone H1, putative	TcCLB.506369.70:TcCLB.510225.10	S1:Acetylation (N-term):1000;00;S11:Phosphorylation (STY):1000;00	18.41	1416.7	13	1.8	709.359	13.39	2430000	F39:1543	10
EIVSNLK(+42.05)DSFR	Trimethylation_KR	histone H3 variant, putative	TcCLB.507033.20:TcCLB.506503.150	K7:Trimethylation_KR:109;97	44.98	1348.73	11	-0.9	675.374	31.7	162000	F41:3524	10
DATAYTEYSRK		histone H4, putative	TcCLB.507941.170:TcCLB.507941.160:TcCLB.508203.20:TcCLB.508203.47:TcCLB.510351.11:TcCLB.510351.31:TcCLB.507941.150:TcCLB.508203.56:TcCLB.508203.29:TcCLB.510351.20:TcCLB.508203.38:TcCLB.511681.20:TcCLB.508739.60		62.56	1303.6	11	-0.3	652.809	15.72	1180000	F22:1997	10
VGSLLRR		histone H2A, putative	TcCLB.510525.110:TcCLB.510525.90:TcCLB.511817.161:TcCLB.511817.140:TcCLB.509207.11:TcCLB.511817.171:TcCLB.511809.135:TcCLB.509207.20:TcCLB.511809.140:TcCLB.511817.180:TcCLB.511817.151:TcCLB.508321.21		42.44	799.503	7	2.3	400.76	15.25	334000	F32:1790	10
HLLLAIRGDEELNQIVNATIAR		histone H2A, putative	TcCLB.511323.40		39.31	2458.37	22	-1.2	820.462	56.99		F20:6525	10
SFVNDLFER		histone H2B, putative	TcCLB.511635.10:TcCLB.511635.20		47.42	1125.55	9	1.4	563.781	41.36	201000	F33:5259	10
FVEGVVR		histone H4, putative	TcCLB.507941.170:TcCLB.507941.160:TcCLB.508203.20:TcCLB.508203.47:TcCLB.510351.11:TcCLB.510351.31:TcCLB.507941.150:TcCLB.508203.56:TcCLB.508203.29:TcCLB.510351.20:TcCLB.508203.38:TcCLB.511681.20:TcCLB.508739.60		50.69	804.449	7	-2.8	403.231	20.64	6350000	F33:2548	11
LLADTNR		histone H3, putative	TcCLB.509471.59:TcCLB.509471.86:TcCLB.509471.77:TcCLB.509471.68		32.8	801.434	7	-0.1	401.724	14.2	671000	F13:1710	11
EVSGAQK(+14.02)EGLR	Methylation_KR	histone H3, putative	TcCLB.509471.59:TcCLB.509471.86:TcCLB.509471.77:TcCLB.509471.68	K7:Methylation_KR:61;37	55.33	1186.63	11	-0.6	594.322	10.22		F24:1286	11
KAPK(+14.02)APGAATGVK	Methylation_KR	histone H3, putative	TcCLB.509471.59:TcCLB.509471.86:TcCLB.509471.77:TcCLB.509471.68	K4:Methylation_KR:51;69	60.59	1208.72	13	0.5	605.37	8.55	333000	F24:1104	11
PGTVALR		histone H3, putative	TcCLB.509471.59:TcCLB.509471.86:TcCLB.509471.77:TcCLB.509471.68		34.97	712.423	7	-0.7	357.219	14.01	3260000	F22:1759	12
WDLYIHR		histone H2B variant, putative	TcCLB.511153.64:TcCLB.506779.150		54.97	1001.51	7	-2.3	501.76	29.08	4980000	F25:3997	12
EVSGAQKEGLR		histone H3, putative	TcCLB.509471.59:TcCLB.509471.86:TcCLB.509471.77:TcCLB.509471.68		52.42	1172.61	11	1	587.315	11.75	177000	F8:1426	13
KAPKAPGAATGVK		histone H3, putative	TcCLB.509471.59:TcCLB.509471.86:TcCLB.509471.77:TcCLB.509471.68		62.04	1194.71	13	1.8	598.362	11.1	265000	F30:1343	13
TVTLAVRHDDDLGTLLKDVTLSR		histone H2A, putative	TcCLB.510525.110:TcCLB.510525.90		72.87	2537.38	23	2.8	846.803	46.48	488000	F32:5191	13
ADLNFPVGR		histone H2A, putative	TcCLB.511323.40		56	987.514	9	-1.3	494.764	28.43	6720000	F22:3769	13
QRSTDLLLQK		histone H3, putative	TcCLB.509471.59:TcCLB.509471.86:TcCLB.509471.77:TcCLB.509471.68		45.29	1200.68	10	2.5	601.35	23.86	483000	F34:2887	14
LKDVTLSR		histone H2A, putative	TcCLB.510525.110:TcCLB.510525.90:TcCLB.511817.161:TcCLB.511817.140:TcCLB.509207.11:TcCLB.511817.171:TcCLB.511809.135:TcCLB.509207.20:TcCLB.511809.140:TcCLB.511817.180:TcCLB.511817.151:TcCLB.508321.21		40.52	930.55	8	3.2	466.284	18.38	631000	F34:2211	14
KFVEGVVR		histone H4, putative	TcCLB.511681.20:TcCLB.508739.60		45.48	932.544	8	2.2	467.281	21.26	232000	F35:2500	14
VVSLLADTNR		histone H3, putative	TcCLB.509471.59:TcCLB.509471.86:TcCLB.509471.77:TcCLB.509471.68		54.38	1086.6	10	1	544.309	28.09		F39:3503	15
YNASREEAYAK		histone H2B variant, putative	TcCLB.511153.64:TcCLB.506779.150		69.82	1300.6	11	-2.7	651.308	12.41	603000	F24:1566	15
VLSSFIEDMYSK		histone H2B variant, putative	TcCLB.511153.64:TcCLB.506779.150		77.82	1417.68	12	-0.7	709.847	41.27	1440000	F24:5264	15
VRLVLPADLAK		histone H2B, putative	TcCLB.511635.10:TcCLB.511635.20		48.34	1193.75	11	1.8	597.883	37.47	1100000	F30:4240	16
AVRHDDDLGTLLKDVTLSR		histone H2A, putative	TcCLB.510525.110:TcCLB.510525.90		52.17	2123.13	19	2.4	708.72	43.05	588000	F32:4880	17
GGVMPSLNK(+42.01)ALAK	Acetylation (K)	histone H2A, putative	TcCLB.510525.110:TcCLB.510525.90:TcCLB.511817.161:TcCLB.511817.140:TcCLB.509207.11:TcCLB.511817.171:TcCLB.511809.135:TcCLB.509207.20:TcCLB.511809.140:TcCLB.511817.180	K9:Acetylation (K):72;65	66.71	1326.73	13	-4.4	664.371	32.87	927000	F24:4361	17
APGAATGVK		histone H3, putative	TcCLB.509471.59:TcCLB.509471.86:TcCLB.509471.77:TcCLB.509471.68		52.89	770.429	9	0.8	386.222	8.57	183000	F19:1112	18
STDLLLQKAPFQR		histone H3, putative	TcCLB.509471.59:TcCLB.509471.86:TcCLB.509471.77:TcCLB.509471.68		68.49	1515.84	13	-2.1	758.926	31.31	339000	F24:4190	18
VRHDDDLGTLLKDVTLSR		histone H2A, putative	TcCLB.510525.110:TcCLB.510525.90		52.19	2052.1	18	2.7	514.033	42.74	4490000	F32:4846	18
HAMSEGTK		histone H2B variant, putative	TcCLB.511153.64:TcCLB.506779.150		55.67	859.386	8	4.8	430.702	7.6	372000	F34:995	18
TITSK		histone H3, putative	TcCLB.509471.59:TcCLB.509471.86:TcCLB.509471.77:TcCLB.509471.68		34.17	548.317	5	-2.2	275.165	32.94	7400000	F20:4166	19
GKILYGYA		histone H4, putative	TcCLB.507941.170:TcCLB.507941.160:TcCLB.508203.20:TcCLB.508203.47:TcCLB.510351.11:TcCLB.510351.31:TcCLB.507941.150:TcCLB.508203.56:TcCLB.508203.29:TcCLB.510351.20:TcCLB.508203.38		53.5	883.48	8	2	442.748	29.76	291000	F9:3512	20
EVSGAQK(+28.03)EGLR	Dimethylation_KR	histone H3, putative	TcCLB.509471.59:TcCLB.509471.86:TcCLB.509471.77:TcCLB.509471.68	K7:Dimethylation_KR:91;04	55.6	1200.65	11	-0.2	601.33	12.27	697000	F8:1493	20
GGK(+42.01)TGGK(+42.01)AGKR	Acetylation (K)	histone H2A, putative	TcCLB.511323.40	K3:Acetylation (K):157;88;K7:Acetylation (K):78;06	46.79	1099.61	11	1.4	550.813	8.89	247000	F4:1125	21
AVRHDDDLGMLLK		histone H2A, putative	TcCLB.511817.161:TcCLB.511817.140:TcCLB.509207.11:TcCLB.511817.171:TcCLB.511809.135:TcCLB.509207.20:TcCLB.511809.140:TcCLB.511817.180:TcCLB.511817.151:TcCLB.508321.21		61.72	1481.77	13	2.2	741.892	33.03	651000	F29:3765	21
KTVTAVDVVNALR		histone H4, putative	TcCLB.507941.170:TcCLB.507941.160:TcCLB.508203.20:TcCLB.508203.47:TcCLB.510351.11:TcCLB.510351.31:TcCLB.507941.150:TcCLB.508203.56:TcCLB.508203.29:TcCLB.510351.20:TcCLB.508203.38:TcCLB.511681.20:TcCLB.508739.60		76.48	1384.8	13	1.6	693.41	39.63	360000	F16:4575	22
TITSKK		histone H3, putative	TcCLB.509471.59:TcCLB.509471.86:TcCLB.509471.77:TcCLB.509471.68		32.38	676.412	6	-1.7	339.213	36.48	5300000	F23:4866	23
RISGVMYDEVR		histone H4, putative	TcCLB.511681.20:TcCLB.508739.60		68	1323.66	11	2.1	662.839	26.85	563000	F35:3099	25
HDDDLGTLLK		histone H2A, putative	TcCLB.510525.110:TcCLB.510525.90		72.64	1125.57	10	-2	563.789	27.66		F23:3755	28
AAQEATESYVVSLLADTNR		histone H3, putative	TcCLB.509471.59:TcCLB.509471.86:TcCLB.509471.77:TcCLB.509471.68		84.04	2037	19	-0.7	1019.51	48.12	129000	F34:5314	30
SFVEGVVR		histone H4, putative	TcCLB.507941.170:TcCLB.507941.160:TcCLB.508203.20:TcCLB.508203.47:TcCLB.510351.11:TcCLB.510351.31:TcCLB.507941.150:TcCLB.508203.56:TcCLB.508203.29:TcCLB.510351.20:TcCLB.508203.38		60.42	891.481	8	-4.1	446.746	24.41	336000000	F23:3302	32
AVRHDDDLGTLLK		histone H2A, putative	TcCLB.510525.110:TcCLB.510525.90		55.82	1451.77	13	2.5	726.896	29.6	160000	F40:3498	33
RLTPR		histone H2A, putative	TcCLB.510525.110:TcCLB.510525.90:TcCLB.511817.161:TcCLB.511817.140:TcCLB.509207.11:TcCLB.511817.171:TcCLB.511809.135:TcCLB.509207.20:TcCLB.511809.140:TcCLB.511817.180:TcCLB.511817.151:TcCLB.508321.21		33.81	641.397	5	2.1	321.707	7.97	246000	F44:1033	33
GGVMPSLNK		histone H2A, putative	TcCLB.510525.110:TcCLB.510525.90:TcCLB.511817.161:TcCLB.511817.140:TcCLB.509207.11:TcCLB.511817.171:TcCLB.511809.135:TcCLB.509207.20:TcCLB.511809.140:TcCLB.511817.180:TcCLB.511817.151:TcCLB.508321.21		60.52	901.469	9	-0.4	451.742	22.04	86800000	F27:2889	33
FQSSAILAAQEATESYVVSLLADTNR		histone H3, putative	TcCLB.509471.59:TcCLB.509471.86:TcCLB.509471.77:TcCLB.509471.68		85.94	2783.4	26	-2.2	1392.7	58.93	47700	F25:7340	35
ARELQTAVR		histone H2B, putative	TcCLB.511635.10:TcCLB.511635.20		42.79	1042.59	9	2.8	522.303	13.99	119000	F14:1687	35
DATAYTEYSR		histone H4, putative	TcCLB.507941.170:TcCLB.507941.160:TcCLB.508203.20:TcCLB.508203.47:TcCLB.510351.11:TcCLB.510351.31:TcCLB.507941.150:TcCLB.508203.56:TcCLB.508203.29:TcCLB.510351.20:TcCLB.508203.38:TcCLB.511681.20:TcCLB.508739.60		75.13	1175.51	10	-1.4	588.761	19.32	615000	F23:2548	37
STDLLLQK		histone H3, putative	TcCLB.509471.59:TcCLB.509471.86:TcCLB.509471.77:TcCLB.509471.68		57.06	916.523	8	3.6	459.27	27.3	1450000	F40:3255	37
TVTLAVR		histone H2A, putative	TcCLB.510525.110:TcCLB.510525.90:TcCLB.511817.161:TcCLB.511817.140:TcCLB.509207.11:TcCLB.511817.171:TcCLB.511809.135:TcCLB.509207.20:TcCLB.511809.140:TcCLB.511817.180:TcCLB.511817.151:TcCLB.508321.21		43.07	758.465	7	-1.6	380.239	19.52	42000000	F23:2576	37
VRHDDDLGTLLK		histone H2A, putative	TcCLB.510525.110:TcCLB.510525.90		52.14	1380.74	12	-1.3	691.375	28.33	898000	F2:3743	42
HDDDLGMLLK		histone H2A, putative	TcCLB.511817.161:TcCLB.511817.140:TcCLB.509207.11:TcCLB.511817.171:TcCLB.511809.135:TcCLB.509207.20:TcCLB.511809.140:TcCLB.511817.180:TcCLB.511817.151:TcCLB.508321.21		74.67	1155.56	10	-0.1	578.787	32.94	29900000	F22:4292	42
ILAAQEATESYVVSLLADTNR		histone H3, putative	TcCLB.509471.59:TcCLB.509471.86:TcCLB.509471.77:TcCLB.509471.68		81.93	2263.17	21	3.1	1132.6	55.22	292000	F33:6506	45
VGSLLR		histone H2A, putative	TcCLB.510525.110:TcCLB.510525.90:TcCLB.511817.161:TcCLB.511817.140:TcCLB.509207.11:TcCLB.511817.171:TcCLB.511809.135:TcCLB.509207.20:TcCLB.511809.140:TcCLB.511817.180:TcCLB.511817.151:TcCLB.508321.21		41.89	643.402	6	-3.1	322.707	17.41	1330000	F20:2265	45
ISGVIYDEVR		histone H4, putative	TcCLB.507941.170:TcCLB.507941.160:TcCLB.508203.20:TcCLB.508203.47:TcCLB.510351.11:TcCLB.510351.31:TcCLB.507941.150:TcCLB.508203.56:TcCLB.508203.29:TcCLB.510351.20:TcCLB.508203.38		70.78	1149.6	10	-1.2	575.808	27.73		F23:3764	46
LLLPPELAK		histone H2B variant, putative	TcCLB.511153.64:TcCLB.506779.150		37.44	992.627	9	-1.8	497.32	35.16	1290000	F25:4856	46
VRHDDDLGMLLK		histone H2A, putative	TcCLB.511817.161:TcCLB.511817.140:TcCLB.509207.11:TcCLB.511817.171:TcCLB.511809.135:TcCLB.509207.20:TcCLB.511809.140:TcCLB.511817.180:TcCLB.511817.151:TcCLB.508321.21		56.16	1410.73	12	2.1	706.373	32.21	457000	F15:3912	46
VTIQPK		histone H3, putative	TcCLB.509471.59:TcCLB.509471.86:TcCLB.509471.77:TcCLB.509471.68		37.18	684.417	6	3.2	343.217	18.59	5110000	F39:2211	49
FQSSAILAAQEATESY		histone H3, putative	TcCLB.509471.59:TcCLB.509471.86:TcCLB.509471.77:TcCLB.509471.68		64.27	1714.8	16	2.3	858.412	41.76	2050000	F39:5129	50
GGVVPFVHK		histone H2A, putative	TcCLB.511323.40		49.47	938.534	9	-1.8	470.273	23.85	164000	F44:2745	50
RIGASGAVYM		histone H2A, putative	TcCLB.510525.110:TcCLB.510525.90:TcCLB.511817.161:TcCLB.511817.140:TcCLB.509207.11:TcCLB.511817.171:TcCLB.511809.135:TcCLB.509207.20:TcCLB.511809.140:TcCLB.511817.180:TcCLB.511817.151:TcCLB.508321.21		46.06	1023.52	10	1.8	512.767	26.67	274000	F28:3315	52
ILRENVR		histone H4, putative	TcCLB.507941.170:TcCLB.507941.160:TcCLB.508203.20:TcCLB.508203.47:TcCLB.510351.11:TcCLB.510351.31:TcCLB.507941.150:TcCLB.508203.56:TcCLB.508203.29:TcCLB.510351.20:TcCLB.508203.38:TcCLB.511681.20:TcCLB.508739.60		41.48	898.535	7	0.9	450.275	12.1	552000	F44:1442	55
DVTLSR		histone H2A, putative	TcCLB.510525.110:TcCLB.510525.90:TcCLB.511817.161:TcCLB.511817.140:TcCLB.509207.11:TcCLB.511817.171:TcCLB.511809.135:TcCLB.509207.20:TcCLB.511809.140:TcCLB.511817.180:TcCLB.511817.151:TcCLB.508321.21		39.78	689.371	6	-1.2	345.692	15.57	2190000	F13:1903	56
AGLIFPVGR		histone H2A, putative	TcCLB.510525.110:TcCLB.510525.90:TcCLB.511817.161:TcCLB.511817.140:TcCLB.509207.11:TcCLB.511817.171:TcCLB.511809.135:TcCLB.509207.20:TcCLB.511809.140:TcCLB.511817.180:TcCLB.511817.151:TcCLB.508321.21		53.14	928.549	9	2.3	465.283	41.59	443000	F5:4242	58
APFQR		histone H3, putative	TcCLB.509471.59:TcCLB.509471.86:TcCLB.509471.77:TcCLB.509471.68		39.26	617.328	5	1	309.672	11.49	2320000	F23:1443	65
SINNHMSMSGR		histone H2B, putative	TcCLB.511635.10:TcCLB.511635.20		79.77	1232.54	11	-1.5	617.276	17.11		F32:2003	68
KKTVTAVDVVNALR		histone H4, putative	TcCLB.507941.170:TcCLB.507941.160:TcCLB.508203.20:TcCLB.508203.47:TcCLB.510351.11:TcCLB.510351.31:TcCLB.507941.150:TcCLB.508203.56:TcCLB.508203.29:TcCLB.510351.20:TcCLB.508203.38:TcCLB.511681.20:TcCLB.508739.60		67.31	1512.9	14	-3	757.454	32.9	805000	F6:3985	71
TLGAR		histone H2B, putative	TcCLB.511635.10:TcCLB.511635.20		27.05	516.302	5	-3.6	259.157	29.21	4220000	F22:3864	75
TVTAVDVVNALRK		histone H4, putative	TcCLB.507941.170:TcCLB.507941.160:TcCLB.508203.20:TcCLB.508203.47:TcCLB.510351.11:TcCLB.510351.31:TcCLB.507941.150:TcCLB.508203.56:TcCLB.508203.29:TcCLB.510351.20:TcCLB.508203.38:TcCLB.511681.20:TcCLB.508739.60		69.52	1384.8	13	2.5	693.411	40.64	6460000	F29:4447	83
FQSSAILAAQEATESYVVS		histone H3, putative	TcCLB.509471.59:TcCLB.509471.86:TcCLB.509471.77:TcCLB.509471.68		72.11	1999.97	19	4.4	1001	60.57	2390000	F33:6954	86
EVSGAQK(+42.05)EGLR	Trimethylation_KR	histone H3, putative	TcCLB.509471.59:TcCLB.509471.86:TcCLB.509471.77:TcCLB.509471.68	K7:Trimethylation_KR:105;60	45.71	1214.66	11	-1.5	608.337	12.09	7480000	F2:1496	99
ELQTAVR		histone H2B, putative	TcCLB.511635.10:TcCLB.511635.20		42.56	815.45	7	-3.3	408.731	27.58		F33:3551	120
IVNSFVNDLFER		histone H2B, putative	TcCLB.511635.10:TcCLB.511635.20		79.02	1451.74	12	-1.7	726.876	40.7	50400	F24:5203	124
HAMAEGTK		histone H2B, putative	TcCLB.511635.10:TcCLB.511635.20		64.6	843.391	8	2.1	422.704	8.68	549000	F23:1118	141
TVTAVDVVNALR		histone H4, putative	TcCLB.507941.170:TcCLB.507941.160:TcCLB.508203.20:TcCLB.508203.47:TcCLB.510351.11:TcCLB.510351.31:TcCLB.507941.150:TcCLB.508203.56:TcCLB.508203.29:TcCLB.510351.20:TcCLB.508203.38:TcCLB.511681.20:TcCLB.508739.60		77.61	1256.71	12	-1.4	629.361	39.1	210000	F19:3979	149
LVLPADLAK		histone H2B, putative	TcCLB.511635.10:TcCLB.511635.20		35.58	938.58	9	0.8	470.298	35.62	3680000	F8:4386	153
HDDDLGTLLKDVTLSR		histone H2A, putative	TcCLB.510525.110:TcCLB.510525.90		89.6	1796.93	16	4.4	899.475	50.18	583000	F40:5383	156
RISGVIYDEVR		histone H4, putative	TcCLB.507941.170:TcCLB.507941.160:TcCLB.508203.20:TcCLB.508203.47:TcCLB.510351.11:TcCLB.510351.31:TcCLB.507941.150:TcCLB.508203.56:TcCLB.508203.29:TcCLB.510351.20:TcCLB.508203.38		68.21	1305.7	11	-2.1	653.858	23.83	26000000	F25:3238	315

## Sheet: Table S5
Table S5. List of modified histone peptides.
Peptide	PEAKS #Spec	MaxQuant #Spec	Protocol1 #Spec	Position	Description	Protein ID	Mass Error [ppm]
TAAK(ac)K(ac)TAR(me2)	0	3	0	K90ac;K91ac;R94me2	histone H1, putative	TcCLB.510225.10	0.067402
QPDQK(ac)K(me3)AS(p)K(me3)	0	3	0	K63ac; K64me3;S66p;K67me3	histone H1, putative	TcCLB.509837.40	0.71453
SDAAVPPKKAS(p)PKK	3	0	0	S73p	histone H1, putative	TcCLB.506369.70	2.8
TAKK(me2)PAAK	3	0	0	K90me2	histone H1, putative	TcCLB.506369.70	3.7
TAKKPAAK(me2)KPAAK	5	0	0	K94me2	histone H1, putative	TcCLB.506369.70	2.4
S(ac)DAAVPPKKAS(p)PK	10	0	0	S63ac;S73p	histone H1, putative	TcCLB.506369.70	1.8
(ac)SDAAVPPK	0	0	10	S63ac	histone H1, putative	TcCLB.509837.40	1.0259
(ac)SDAAVPPKK	0	0	14	S63ac	histone H1, putative	TcCLB.509837.40	0.18303
(ac)SDAAVPPKKASPK	0	0	1	S63ac	histone H1, putative	TcCLB.509837.40	0.45846
AVNK(ac)SAK(me3)	0	1	0	K55ac;K58me3	histone H1, putative	TcCLB.509837.40	NaN
K(ac)AVNKSAK(me3)	0	1	0	K51ac;K58me3	histone H1, putative	TcCLB.509837.40	NaN
SSK(ac)KAR(me1)ATPSA	2	0	0	K126ac;R129me1	histone H2A, putative	TcCLB.510525.110	1
SSK(ac)K(me1)ARATPSA	7	0	0	K126ac;K127me1	histone H2A, putative	TcCLB.510525.110	0.5
ALAK(ac)K(ac)HK	8	6	0	K120ac;K121ac	histone H2A, putative	TcCLB.510525.110	0.10073
GGVMPSLNK(ac)ALAK(ac)K(ac)HK	9	0	0	K116ac;K120ac;K121ac	histone H2A, putative	TcCLB.510525.110	1.3
GGVMPSLNK(ac)ALAK	17	10	4	K116ac	histone H2A, putative	TcCLB.510525.110	0.074558
GGK(ac)TGGK(ac)AGKR	21	0	0	K54ac;K58ac	histone H2A, putative	TcCLB.511323.40	1.4
GGVM(ox)PSLNK(ac)ALAK	0	0	1	K116ac	histone H2A, putative	TcCLB.509207.11	1.3713
RPASATRKASGGK(ac)K	1	0	0	K32ac	histone H2B variant, putative	TcCLB.511153.64	9.7
ASGGK(ac)KK(me2)	0	2	1	K32ac;K34me2	histone H2B variant, putative	TcCLB.511153.64	0.70775
M(ox)ATPK(me3)SSSANR(me1)K(me1)	0	1	0	K4me3;R10me1;K11me1	histone H2B, putative	TcCLB.511635.20	0.83411
IAS(p)EAATVVRVNKK	5	0	0	S63p	histone H2B, putative	TcCLB.511635.10	-3.8
EIVSNLK(me1)DSFR	1	0	0	K94me1	histone H3 variant, putative	TcCLB.507033.20	-4.8
EIVSNLK(me2)DSFR	3	0	1	K94me2	histone H3 variant, putative	TcCLB.507033.20	-1
EIVSNLK(me3)DSFR	10	2	1	K94me3	histone H3 variant, putative	TcCLB.507033.20	0.37481
APKAPGAAT(p)GVK	1	0	0	T29p	histone H3, putative	TcCLB.509471.59	4.7
K(ac)(ac)KAPK(ac)APGAAT	1	0	0	K19ac;K23ac	histone H3, putative	TcCLB.509471.59	9
APK(me3)APGAATGVK	5	0	1	K23me3	histone H3, putative	TcCLB.509471.59	-3.8
APK(me2)APGAATGVK	9	1	3	K23me2	histone H3, putative	TcCLB.509471.59	0.50775
KAPK(me1)APGAATGVK	11	2	1	K23me1	histone H3, putative	TcCLB.509471.59	0.12532
APK(me1)APGAATGVK	0	0	1	K23me1	histone H3, putative	TcCLB.505931.40	0.38411
EVSGAQK(me1)EGLR	11	3	3	K76me1	histone H3, putative	TcCLB.509471.59	0.043374
EVSGAQK(me2)EGLR	20	11	2	K76me2	histone H3, putative	TcCLB.509471.59	0.014852
EVSGAQK(me3)EGLR	99	30	1	K76me3	histone H3, putative	TcCLB.509471.59	0.022953
EVSGAQK(ac)EGLR(me2)*	0	1	1	K76ac;R80me2	histone H3, putative	TcCLB.505931.40	NaN
SGEAK(ac)GTQK(ac)R	3	2	1	K10ac;K14ac	histone H4, putative	TcCLB.507941.170	0.52734
